Westra et al.

1 **Fine-mapping identifies causal variants for**  
2 **RA and T1D in *DNASE1L3*, *SIRPG*, *MEG3*,**  
3 ***TNFAIP3* and *CD28/CTLA4* loci**

4

5 Harm-Jan Westra<sup>1,2</sup>, Marta Martinez Bonet<sup>3</sup>, Suna Onengut<sup>4,5</sup>, Annette Lee<sup>6</sup>, Yang Luo<sup>1,2</sup>,  
6 Nick Teslovich<sup>1,2</sup>, Jane Worthington<sup>7</sup>, Javier Martin<sup>8</sup>, Tom Huizinga<sup>9</sup>, Lars Klareskog<sup>10</sup>,  
7 Solbritt Rantapaa-Dahlqvist<sup>10,11</sup>, Wei-Min Chen<sup>4,5</sup>, Aaron Quinlan<sup>4,12</sup>, John A. Todd<sup>13</sup>,  
8 Steve Eyre<sup>7</sup>, Peter A. Nigrovic<sup>3,14</sup>, Peter K. Gregersen<sup>6</sup>, Stephen S Rich<sup>4,5</sup>, Soumya  
9 Raychaudhuri<sup>1,2,3,14,15,\*</sup>

10

11 <sup>1</sup> Division of Genetics and Rheumatology, Brigham and Women's Hospital, Harvard Medical School, Boston, MA, USA  
12 <sup>2</sup> Program in Medical and Population Genetics, Broad Institute of Harvard and MIT, Cambridge, MA, USA  
13 <sup>3</sup> Division of Rheumatology, Immunology, and Allergy, Brigham and Women's Hospital, Harvard Medical School, Building for  
14 Transformative Medicine, 60 Fenwood Road, Boston MA 02115  
15 <sup>4</sup> Department of Public Health Sciences, University of Virginia, Charlottesville, Virginia 22908-0717 USA  
16 <sup>5</sup> Center for Public Health Genomics, University of Virginia, Charlottesville, Virginia 22908-0717 USA  
17 <sup>6</sup> The Feinstein Institute for Medical Research, Northwell Health, Manhasset, New York, USA  
18 <sup>7</sup> Arthritis Research UK Centre for Genetics and Genomics, Musculoskeletal Research Centre, Institute for Inflammation and  
19 Repair, Manchester Academic Health Science Centre, University of Manchester, Manchester, UK  
20 <sup>8</sup> Instituto de Parasitología y Biomedicina López-Neyra, Consejo Superior de Investigaciones Científicas, Granada, Spain  
21 <sup>9</sup> Department of Rheumatology, Leiden University Medical Centre, Leiden, the Netherlands  
22 <sup>10</sup> Rheumatology Unit, Department of Medicine, Karolinska Institutet and Karolinska University Hospital Solna, Stockholm, Sweden  
23 <sup>11</sup> Department of Public Health and Clinical Medicine, Rheumatology, Umeå University, Umeå, Sweden  
24 <sup>12</sup> Department of Human Genetics, University of Utah, Salt Lake City, Utah, USA  
25 <sup>13</sup> JDRF/Wellcome Trust Diabetes and Inflammation Laboratory, Wellcome Trust Centre for Human Genetics, Nuffield Department  
26 of Medicine, University of Oxford OX3 7BN  
27 <sup>14</sup> Division of Immunology, Boston Children's Hospital, Boston MA 02115, USA  
28 <sup>15</sup> Faculty of Medical and Human Sciences, University of Manchester, Manchester, UK

29

30 \* Correspondence to:

31 Soumya Raychaudhuri

32 77 Avenue Louis Pasteur, Harvard New Research Building, Suite 250D

33 Boston, MA 02446, USA.

34 [soumya@broadinstitute.org](mailto:soumya@broadinstitute.org); 617-525-4484 (tel); 617-525-4488 (fax)

Westra et al.

35 **We fine-mapped 76 rheumatoid arthritis (RA) and type 1 diabetes (T1D) loci**  
36 **outside of the MHC. After sequencing 799 1kb regulatory (H3K4me3)**  
37 **regions within these loci in 568 individuals, we observed accurate**  
38 **imputation for 89% of common variants. We fine-mapped<sup>1,2</sup> these loci in RA**  
39 **(11,475 cases, 15,870 controls)<sup>3</sup>, T1D (9,334 cases and 11,111 controls)<sup>4</sup> and**  
40 **combined datasets. We reduced the number of potential causal variants to**  
41 **≤5 in 8 RA and 11 T1D loci. We identified causal missense variants in five**  
42 **loci (*DNASE1L3*, *SIRPG*, *PTPN22*, *SH2B3* and *TYK2*) and likely causal non-**  
43 **coding variants in six loci (*MEG3*, *TNFAIP3*, *CD28/CTLA4*, *ANKRD55*, *IL2RA*,**  
44 ***REL/PUS10*). Functional analysis confirmed allele specific binding and**  
45 **differential enhancer activity for three variants: the *CD28/CTLA4***  
46 **rs117701653 SNP, the *TNFAIP3* rs35926684 indel, and the *MEG3* rs34552516**  
47 **indel. This study demonstrates the potential for dense genotyping and**  
48 **imputation to pinpoint missense and non-coding causal alleles.**

49

50 RA is an autoimmune disease in which chronic inflammation leads to joint  
51 destruction, which is associated with autoantibodies to citrullinated proteins in  
52 the majority of cases<sup>5</sup>. T1D arises through autoimmune destruction of pancreatic  
53 beta-cells, leading to complete loss of insulin production. Autoantibodies in T1D  
54 include those reactive to proinsulin<sup>6</sup> and glutamic acid decarboxylase<sup>7</sup>. Genome  
55 wide association studies (GWAS) have identified over 101 RA loci<sup>3,8</sup> and 53 T1D  
56 loci<sup>4</sup>. In order to define causal variants, fine-mapping has now been successfully

Westra et al.

57 applied to complex disease loci including inflammatory bowel disease<sup>9</sup>, type 2  
58 diabetes<sup>1,10</sup>, coronary artery disease<sup>1</sup>, Graves disease<sup>1</sup>, and multiple sclerosis<sup>11</sup>.  
59 Since causal variants for both RA and T1D diseases overlap functional elements  
60 in CD4+ T cells<sup>12</sup>, we fine-mapped autosomal non-MHC loci for both diseases  
61 together.

62

63 We used ImmunoChip data for RA (11,475 cases, 15,870 controls)<sup>3</sup>, and T1D  
64 (9,334 cases and 11,111 controls; **Supplementary Table 1**)<sup>4</sup>. This platform  
65 contains dense coverage of single nucleotide polymorphisms (SNP) in selected  
66 autoimmune disease loci, enabling accurate imputation. Among these loci, 46  
67 and 49 non-MHC autosomal loci have known significant associations for RA and  
68 T1D, respectively. Since RA and T1D share 19 loci, we examined 76 unique  
69 ImmunoChip loci in total (**Supplementary Table 2**).

70

71 We used three high-quality reference panels and selected the imputation  
72 strategy that maximizes coverage and accuracy for common variants (minor  
73 allele frequency; MAF>1%): 1) the Haplotype Reference Consortium (HRC, v1.1)  
74 reference panel (consisting of 64,976 haplotypes from 20 independent  
75 sequencing studies<sup>13</sup>), 2) the 1000 genomes (1KG, 3v5) European subpopulation  
76 (EUR) and 3) the 1KG cosmopolitan panel (COSMO)<sup>14</sup>. To evaluate accuracy of  
77 each strategy, we sequenced 568 individuals genotyped on ImmunoChip,  
78 targeting 799 1,000 bp regions centered around H3K4me3 peaks in

Westra et al.

79 ImmunoChip regions (**Online Methods**). From this data, we called 1,862 variants  
80 (MAF>1%; **Supplementary Figure 1; Supplementary Table 3**), which we  
81 compared to imputed genotypes. EUR and COSMO provided higher accuracy,  
82 compared to the HRC (89% vs 84% of variants with  $r^2_g > 0.5$ ; **Figure 1A&B**,  
83 **Supplementary Tables 4-5**). Imputation with COSMO obtained 1.8% higher  
84 coverage for variants with high quality (INFO>0.3) variants than with EUR  
85 (**Supplementary Table 6**). The difference between COSMO and HRC was  
86 partially due to the inclusion of insertion/deletion variants (indels) in COSMO  
87 (**Supplementary Figure 2 and 3**). INFO-scores were consistent with imputation  
88 accuracy (**Supplementary Figure 4**). We therefore opted to use COSMO to  
89 impute genotypes.

90

91 Notably, even this best performing strategy had incomplete variant coverage:  
92 4% of common variants in the targeted sequencing experiment were missed  
93 altogether, of which 75% were indels and multi-allelic variants (**Supplementary**  
94 **Figure 5**).

95

96 We focused our analysis on a subset of the loci with a tractable number of  
97 putative causal variants within our data set. First, we calculated association  
98 statistics for 64,430 and 66,115 imputed and genotyped variants for RA and T1D  
99 (MAF>1%, INFO>0.3; Hardy-Weinberg  $p > 10^{-5}$ ) in the 76 loci. We observed  
100 association in 20 and 36 loci, for RA and T1D ( $p < 7.5 \times 10^{-7} = 0.05/66,115$  tests;



Westra et al.

101 **Supplementary Table 7 and 8**). For 50% (=10/20) of RA and 72% (=26/36) of  
102 T1D loci, the most significant variant was in linkage disequilibrium (LD;  $r^2 > 0.8$ )  
103 with the most significant previously published variant (**Supplementary Table 7**  
104 **and 8**). RA and T1D variant effect sizes were positively correlated in 64% of the  
105 tested loci (**Online methods, Supplementary Table 9, Supplementary Figure**  
106 **6**) suggesting shared signals. We therefore analyzed a combined dataset with  
107 20,787 (RA or T1D) cases and 18,616 unique controls (**Online methods**). We  
108 restricted our analysis to 28 loci with sufficient statistical signal to warrant fine-  
109 mapping in the combined dataset ( $p < 7.5 \times 10^{-7}$ ). In the combined dataset, the  
110 strongest associated variant was in strong LD with the strongest associated  
111 variant in either RA or T1D in 69% of significant loci ( $r^2 > 0.8$ ; **Supplementary**  
112 **Table 10 and 11**). To prioritize loci with causal variation that we might be able to  
113 pinpoint, we created 90% credible sets using an approximate Bayesian  
114 approach<sup>1,2</sup> and limited subsequent analysis to the 10 (RA), 15 (T1D) and 11  
115 (combined) loci having  $\leq 10$  variants in the 90% credible sets (**Figure 2A&B;**  
116 **Supplementary Table 12**). Within the significant loci, we observed a striking  
117 18.3-fold posterior probability enrichment for missense variants.

118

119 We identified those alleles as likely causal if they had strong statistical genetic  
120 evidence and evidence of altered function (**Table 1**). To define strong candidate  
121 alleles, we defined three overlapping categories of promising loci: loci with 1) a  
122 single variant with a very high posterior probability ( $> 0.8$ , *DNASE1L3*, *PTPN22*,

Westra et al.

123 *TYK2, CTLA4/CD28, REL/PUS10, IL2RA*), 2) a single missense variant with a  
124 modest posterior probability ( $>0.2$ , *DNASE1L3, PTPN22, SH2B3, TYK2, SIRPG*),  
125 or 3) a single non-coding indel with a modest posterior probability ( $>0.2$ ,  
126 *TNFAIP3, MEG3, ANKRD55*; **Figure 2C; Supplementary Table 12**). We applied  
127 more modest thresholds to missense variants and indels, since they are *a priori*  
128 more likely to be functional. We considered high probability non-coding variants  
129 causal only if they met stringent additional criteria criteria suggesting function: 1)  
130 they occurred in a region with evidence of enhancer activity and 2) they  
131 demonstrated clear allele specific binding and enhancer function in vitro in both  
132 EMSA and luciferase assays.

133

134 We identified missense variants at *DNASE1L3* and *SIRPG*. We also identified  
135 causal missense variants at *PTPN22, SH2B3*, and *TYK2*, which are well  
136 described in the literature<sup>4,15-17</sup> (**Supplementary Note and Supplementary**  
137 **Figures 7-9**). Their identification suggests the sensitivity of our approach is high.

138

139 The 3p14 *DNASE1L3* locus, strongly associated with RA, but not T1D ( $p>0.02$ ,  
140 **Supplementary Figure 10**), had a missense variant with high posterior  
141 probability. The previously reported<sup>3</sup> lead SNP rs35677470 was included as one  
142 of the 5 variants within the 90% credible set of causal variants ( $p=1.7\times 10^{-8}$ ;  
143 posterior=0.81; **Supplementary Table 12**), and encodes a R206C change in the

Westra et al.

144 *DNASE1L3* protein product. After conditioning on R206C, we observed no  
145 evidence of independent risk variants ( $p > 5 \times 10^{-4}$ ; **Supplementary Table 13**).  
146 R206C has been implicated with systemic sclerosis<sup>18</sup> and other loss of function  
147 mutations in *DNASE1L3* have been reported in familial forms of systemic lupus  
148 erythematosus<sup>19</sup>. R206C is a loss of function allele that abolishes the protein  
149 product's nuclease activity<sup>20</sup>.

150

151 Within the *SIRPG* locus, we identified a missense variant with high posterior  
152 (rs6043409;  $p = 3.94 \times 10^{-10}$ ; posterior=0.25), causing a V263A substitution in the  
153 *SIRPG* gene product (**Supplementary Figure 11; Supplementary Table 12**).  
154 Conditional analysis using rs6043409 obviated the association signal in the  
155 locus ( $p > 2 \times 10^{-3}$ ). Since the consequence of V263A substitution on *SIRPG*  
156 function has yet to be described, we nominate it as a causal variant with  
157 caution.

158

159 Next, we focus on non-coding likely causal variants. We identified non-coding  
160 allele specific function in *CTLA4/CD28*, *TNFAIP3*, and *MEG3* using EMSA and  
161 luciferase assays in regions with evidence of CD4+ T cell enhancer function  
162 (**Table 1**). Loci having candidate variants with high posterior probabilities, but  
163 without evidence of allelic function, are presented in the **Supplementary Note**  
164 **and Supplementary Figures 12-14**.

Westra et al.

165

166 The *CD28/CTLA4* locus has previously been shown to have shared association  
167 signals for RA and T1D<sup>21</sup> and variant effect sizes between diseases are highly  
168 correlated in our analysis (Spearman's rank  $r=0.9$ ; **Supplementary Table 9**). In  
169 the combined analysis, we observed a single credible variant (rs3087243;  
170  $p=1.4 \times 10^{-16}$ ; posterior=0.91) near *CTLA4*. That same variant has the largest  
171 posterior probability in T1D ( $p=1.7 \times 10^{-15}$ ; posterior=0.46; **Figure 3A**;  
172 **Supplementary Figure 15A; Supplementary Table 12**), but not in RA  
173 ( $p=1.6 \times 10^{-8}$ ; posterior=0.01). In contrast, in RA the rs117701653 variant carries  
174 high posterior probability ( $p=1.3 \times 10^{-10}$ ; posterior=0.82); it is located closer to  
175 *CD28* and is not linked to rs3087243 ( $r^2=0.03$ ). Conditioning on rs3087243, we  
176 observed an independent effect at rs117701653 in RA ( $p=1.8 \times 10^{-8}$ ), (**Figure 3A**;  
177 **Supplementary Table 13**). To confirm the two independent effects, we tested  
178 all pairs of SNPs exhaustively and observed that the rs3087243+rs117701653  
179 pair demonstrates the most significant association of all SNP pairs in RA (**Figure**  
180 **3B, Supplementary Figure 15B**). Haplotype analysis confirmed the  
181 independent protective effects of the rs3087243 A allele and of the rs117701653  
182 C allele in both RA and T1D (**Figure 3C**), suggesting that rs117701653 may  
183 contribute to risk similarly in T1D ( $p=0.03$  in conditional haplotype analysis).

184

Westra et al.

185 We observed that both rs117701653 and rs3087243 may have regulatory  
186 function since they overlap H3K4me3 peaks in immune cell types, and disrupt  
187 protein binding motifs (**Supplementary Table 14 and 15**). Since regulatory  
188 regions can be context specific, we stimulated CD4+ T cells using CD3/CD28  
189 beads, and measured chromatin accessibility using ATAC-seq before and after  
190 stimulation. We observed ATAC-seq peak overlap for rs117701653 only after  
191 stimulation (**Supplementary Table 16**), suggesting that rs117701653 may  
192 function specifically in stimulated cells. We note that while we did not observe  
193 linkage to eQTL in whole blood or T cells (**Supplementary Table 17**), rs3087243  
194 did show a significant eQTL on *CTLA4* in testis<sup>22</sup>.

195

196 We demonstrated allele specific binding for rs117701653 but not rs3087243  
197 using EMSA with Jurkat T cells (**Figure 3D**). The rs117701653 C allele showed  
198 higher specific binding affinity compared to the A allele (**Supplementary Figure**  
199 **15C**). We also observed higher luciferase expression induced by the C allele  
200 compared to the A allele ( $p=0.0017$ ; **Figure 3E**), suggesting allele specific  
201 enhancer activity. The binding is lineage specific: it was absent with THP-1  
202 monocytic cells (**Supplementary Figure 15C**). As a relevant negative control,  
203 we also tested the second variant in the RA credible set (rs55686954;  
204 posterior=0.14), which showed no evidence of allele specific enhancer function  
205 (**Supplementary Figure 15C&D**). Published promoter capture Hi-C assays<sup>23</sup>  
206 show local genomic contacts between the region harboring the rs117701653

Westra et al.

207 SNP, the *CTLA4* promoter, and a region downstream of *RAPH1*  
208 (**Supplementary Figure 16**), indicating this allele might be regulating *CTLA4* or  
209 *RAPH1* despite proximity to *CD28*.

210

211 The *TNFAIP3* locus is associated with multiple autoimmune diseases<sup>24-30</sup>,  
212 including RA, but not T1D ( $p > 2.3 \times 10^{-4}$ ). We observed that the indel rs35926684  
213 carries the highest posterior probability ( $p = 6.8 \times 10^{-12}$ ; posterior=0.24; **Figure 4A**;  
214 **Supplementary Table 12; Supplementary Figure 17A**) of 7 variants in the RA  
215 credible set. Conditional analysis revealed an independent association at  
216 rs58721818 ( $p = 3.6 \times 10^{-5}$ ; LD  $R^2 = 0.05$  with rs35926684; **Figure 4A**;  
217 **Supplementary Table 13**). A previous study<sup>3</sup> identified rs6920220 (linked to  
218 rs35926684;  $r^2 = 0.88$ ) as the primary signal and secondary signals from  
219 rs5029937 (linked to rs58721818;  $r^2 = 0.84$ ) and rs13207033. Exhaustive pairwise  
220 analysis demonstrated comparable association for rs35926684+rs58721818 pair  
221 ( $-\log_{10}(p) = 13.94$ ) and the most strongly associated rs6920220+rs58721818 pair  
222 ( $-\log_{10}(p) = 14.14$ ; **Figure 4B; Supplementary Figure 17B**). Haplotypes having  
223 the rs35926684 G allele increased risk for RA, even in absence of the highly  
224 linked rs6920220 A risk allele (i.e. GGGC vs GAGC; **Figure 4C**), although this  
225 effect was only suggestive in conditional haplotype analysis ( $p = 0.14$ ).

226

Westra et al.

227 The rs35926684 indel alters more binding motifs, and overlaps more enhancer  
228 marks in immune related cell types, compared to rs6920220 (**Supplementary**  
229 **Table 14 and 15**). Neither rs35926684 nor rs6920220 overlapped open  
230 chromatin region in our ATAC-seq time course (**Supplementary Table 16**), nor  
231 were linked with eQTLs in whole blood or T-cells (**Supplementary Table 17**).

232

233 EMSA with Jurkat cells demonstrated specific binding for rs35926684 (**Figure**  
234 **4D**). Dose titration of the probe demonstrated specific binding for both G and  
235 GA allele, but stronger GA binding (**Supplementary Figure 17C**). Luciferase  
236 assays also demonstrated increased enhancer activity with the GA-allele  
237 compared to both the empty vector ( $p=7 \times 10^{-4}$ ) and the G allele ( $p=0.053$ , **Figure**  
238 **4E**). We did not observe specific binding with THP-1 cells, indicating cell type  
239 specificity (**Supplementary Figure 17C**). As a relevant negative control, we  
240 observed no allele specific binding for rs6920220 (**Supplementary Figure 17C**).  
241 Interestingly, in previously published promoter capture Hi-C data, the  
242 rs35926684 region contacts the *TNFAIP3* promoter<sup>31</sup> as well as the *IL22RA* and  
243 *IFNGR1* promoters (**Supplementary Figure 16**)<sup>23</sup>, suggesting genes with  
244 immune function may be influenced by this RA risk allele.

245

246 *MEG3* is a non-coding RNA tumor suppressor gene whose transcript binds to  
247 p53<sup>32</sup>. In T1D, this locus has previously been described as an imprinted region,

Westra et al.

248 with greater risk carried by paternally inherited alleles<sup>33</sup>. We observed two  
249 variants in the credible set for T1D in this locus: the rs34552516 indel  
250 ( $p=1.1 \times 10^{-9}$ ; posterior=0.37) and the rs56994090 intronic variant ( $p=7.3 \times 10^{-10}$ ;  
251 posterior=0.54, **Figure 5A; Supplementary Figure 18A; Supplementary Table**  
252 **12**). The locus shows no association with RA ( $p>0.04$ ). Conditioning on  
253 rs34552516, we observed no evidence of additional independent effects  
254 ( $p>0.04$ ; **Supplementary Table 13**). Both variants overlap DNase-I sensitive,  
255 H3K4me1, and H3K4me3 regions in multiple immune cell types (**Supplementary**  
256 **Table 14**), but do not overlap open chromatin regions in our ATAC-seq  
257 experiment (**Supplementary Table 16**).

258

259 EMSA with Jurkat cells showed protein binding specific to the TC allele of  
260 rs34552516 (**Figure 5B**), and the rs34552516 TC allele showed a significant  
261 increase in luciferase activity compared to empty vector ( $p=0.01$ ) and the T allele  
262 ( $p<0.05$ ; **Figure 5C**). We observed no specific binding with THP-1 cells  
263 (**Supplementary Figure 18B**), indicating lineage specificity (**Figure 5B**). As a  
264 relevant negative control, we did not observe allele specific binding for  
265 rs56994090. The region harboring rs34552516 in promoter-capture Hi-C data<sup>23</sup>  
266 showed contacts, including the promoter of *DIO3* and *RP11-1029J19*  
267 (**Supplementary Figure 16**), indicating that this risk allele may affect interaction  
268 with multiple downstream genes.



Westra et al.

269

270 In this study, we identified three non-coding causal alleles with high posterior  
271 probability based on association data, and evidence of allele specific binding or  
272 enhancer function (**Table 1**). We observed in targeted sequencing that a  
273 proportion of causal variants might be missed by any imputation strategy,  
274 particularly indels or multiallelic variants. We therefore recognize that attempting  
275 to fine-map other loci may be more successful once more complete reference  
276 panels based on whole genome sequencing data become available, such as  
277 through the TopMed initiative (<https://www.nhlbiwgs.org/>).

278

279 Notably, the non-coding causal variants that we identified did not overlap with  
280 eQTL in either whole blood or T cells (**Supplementary Table 17**). Therefore, to  
281 elucidate the mechanisms underlying these variants, studies will be required to  
282 identify the precise protein complexes that bind these enhancers, and the  
283 downstream functions of those complexes.

284

285 We also identified other non-coding variants with high posterior probabilities  
286 that could feasibly be pursued for validation, but did not demonstrate clear  
287 evidence of allele-specific function in our assays. Other more sensitive assays,  
288 or application of assays in other non-CD4+ T cell-types might ultimately be able  
289 to confirm the function of these alleles too.

Westra et al.

## 290 **Data Availability**

291 Summary statistics for all variants will be made available upon acceptance.

292 Genotype data is previously published<sup>3,4</sup> and is available from RACI and  
293 T1DGCC upon request. ATAC seq data will be deposited upon acceptance of  
294 this manuscript to GEO.

295

296 Bios eQTL browser: <http://genenetwork.nl/biosqtlbrowser/>, Roadmap  
297 epigenomics datasets: <http://www.roadmapepigenomics.org/>, ChromHMM  
298 enhancers and promoters: [http://egg2.wustl.edu/roadmap/web\\_portal/](http://egg2.wustl.edu/roadmap/web_portal/), 1000  
299 genomes reference panel:  
300 [http://bochet.gcc.biostat.washington.edu/beagle/1000\\_Genomes\\_phase3\\_v5a/](http://bochet.gcc.biostat.washington.edu/beagle/1000_Genomes_phase3_v5a/),  
301 Haplotype Reference Consortium panel: [http://www.haplotype-reference-](http://www.haplotype-reference-consortium.org/)  
302 [consortium.org/](http://www.haplotype-reference-consortium.org/)

303

## 304 **Code Availability**

305 Associated computer code for this manuscript can be found at the following  
306 GitHub repositories:

307 <https://github.com/immunogenomics/harmjan/tree/master/FinemappingPaper>  
308 and

309 <https://github.com/immunogenomics/harmjan/tree/master/FinemappingTools>

310

## 311 **Author Contributions**

312 **Analysis:** H-J.W., Y.L., S.R.; **Functional Assays:** M.M.B., P.A.N.

313 **Study Design:** H-J.W., P.A.N., S.R.; **Data Acquisition:** S.O., A.L., N.T., J.W.,  
314 J.M., T.H., L.K., S.R-D., W-M. C., A.Q., J.A.T., P.K.G., S.S.R., S.R.; **Writing and**  
315 **editing manuscript:** H-J.W., M.M.B., Y.L., J.A.T., P.A.N., P.K.G, S.S.R., S.R

316

Westra et al.

317 **Acknowledgements**

318 This work is supported in part by funding from the National Institutes of Health  
319 (U01GM092691, UH2AR067677, 1U01HG009088, and 1R01AR063759 (SR)),  
320 and the Doris Duke Charitable Foundation Grant #2013097. This work is part of  
321 the research program Rubicon ALW with project number #825.14.019 (HJW),  
322 which is (partly) financed by the Netherlands Organization for Scientific  
323 Research (NWO). Further support was provided by the Wellcome Trust  
324 [107212/Z/15/Z] and JDRF [5-SRA-2015-130-A-N] to the Diabetes and  
325 Inflammation Laboratory and by the Wellcome Trust [203141/Z/16/Z] to the  
326 Wellcome Trust Centre for Human Genetics. PKG was supported in part by the  
327 Feinstein Institute and a generous gift from Eileen Ludwig Greenland (PKG). PAN  
328 is supported by a Rheumatology Research Foundation Disease Targeted  
329 Research Grant, NIH P30 AR070253, and the Fundación Bechara.

330

331 **Competing financial interests**

332 None declared

Westra et al.

## 333 **Online Methods**

### 334 **Patient collections**

335 We used genotyping data from samples that were collected on the ImmunoChip  
336 platform, which were obtained with informed consent and described in previous  
337 publications (**Supplementary Table 1**)<sup>3,4</sup>. In summary, for RA, we used  
338 ImmunoChip data for 11,475 cases and 15,870 controls, collected by six  
339 different cohorts (UK, Swedish EIRA, United States, Dutch, Swedish UMEA, and  
340 Spanish)<sup>3</sup>. For T1D, we used ImmunoChip data for 12,241 cases and 14,636  
341 controls divided over two different cohorts, that have been described earlier<sup>4</sup>:  
342 the T1DGC family collection (T1D EUR) and the UK GRID, British 1958 Birth  
343 cohort and UK Blood Service collection (T1D UK). In order to include trios from  
344 the T1D EUR cohort in a case-control analysis, we generated pseudocontrol  
345 pairs for each affected individual using the untransmitted alleles from the  
346 parents of that individual. As a consequence, the final number of individuals for  
347 T1D was 9,334 cases, and 11,111 controls (including 1,661 pseudocontrols).  
348 Quality control on the genotypes was performed as described in the previously  
349 published studies. Additionally, we merged the genotype data for the different  
350 cohorts within T1D and RA using PLINK<sup>34</sup>, and converted genomic coordinates  
351 using the UCSC liftOver tool and the hg18ToHg19 chain file. Variants unable to  
352 liftOver were removed. We then replaced the variant identifiers using NCBI  
353 dbSNP build 138. Finally, we removed variants with a MAF < 0.5%.

354

Westra et al.

## 355 **Imputation**

356 In order to assess which imputation strategy was best suited for fine-mapping,  
357 we tested three reference panels: 1) The European subpopulation of 1000  
358 genomes (N=503), 2) the cosmopolitan panel of 1000 genomes (N=2,504), and  
359 3) the HRC v1.1 reference panel (N=32,611). Our approach used three steps  
360 (matching, imputation, and merging). First, we matched variants to each  
361 reference panel: we removed variants that were not present in the reference  
362 panel and aligned the strands of the remaining ImmunoChip genotypes. We  
363 excluded variants when alleles could not be matched, or in the case of C/G and  
364 A/T variants, when the minor allele was unequal. If we observed an unequal  
365 minor allele for such variants, and the reference panel and ImmunoChip MAF  
366 was >45%, we chose to flip the allele in the ImmunoChip data. For multi-allelic  
367 variants, we ensured that the allele encoding was identical relative to the  
368 reference panel variant. As a consequence of these steps, the input for each  
369 reference panel was slightly different (**Supplementary Table 4**). Second, we  
370 imputed genotypes into RA and T1D separately. We phased and imputed the  
371 1000 genomes reference panels using Beagle v4.1 (version 22Apr16.1cf)<sup>35</sup>. In  
372 order to accommodate computational constraints of Beagle, we split the RA and  
373 T1D datasets into 30 batches, randomizing cases and controls between  
374 batches, while maintaining trio structure in the T1D dataset. Since the HRC v1.1  
375 reference panel genotype data is not publicly available, we evaluated different  
376 imputation servers and settings for the T1D dataset, in order to determine their

Westra et al.

377 effects on imputation output. On the Sanger Institute imputation server (date of  
378 access: May 11, 2016), we used prephasing with either EAGLE<sup>36</sup> or SHAPEIT<sup>37</sup>,  
379 followed by imputation with PBWT<sup>38</sup>. On the Michigan University server (date of  
380 access: July 5, 2016), we used prephasing with EAGLE<sup>36</sup>, followed by MiniMac<sup>39</sup>  
381 imputation. Due to the constraints of the Michigan University imputation server  
382 website, we split the dataset into three batches, randomizing cases and controls  
383 while maintaining trios. For RA, we performed HRC imputation on the Sanger  
384 imputation server using EAGLE prephasing followed by PBWT imputation. Third,  
385 we merged the imputed dosages and probabilities from each batch (if any) for  
386 each imputation reference panel, and replaced the variant identifiers in the  
387 imputed output using NCBI dbSNP build 138. Before calculating association  
388 statistics, we replaced genotypes for variants genotyped on ImmunoChip with  
389 the original genotypes. Finally, we recalculated the imputation quality scores for  
390 each imputed variant in each dataset: for biallelic variants, we used the INFO  
391 score and Beagle v4.1 allelic- $R^2$  for multi allelic variants.

392

### 393 **Targeted sequencing**

394 In order to test the accuracy of imputation, we sequenced targeted regions in  
395 864 individuals (160 T1D trios and 384 unrelated RA cases, of which 480 and  
396 149 were on ImmunoChip, respectively). We used the Illumina MiSeq platform to  
397 generate 100bp paired-end reads. We sequenced 900 regions of 1,000bp  
398 around H3K4me3 peaks centers overlapping loci associated with either disease,

Westra et al.

399 since these loci are most likely to harbor causal variants<sup>12</sup>. We used BWA-mem<sup>40</sup>  
400 (v0.7.12) to align reads to the hg19 reference genome. We tagged and removed  
401 duplicate reads using Picard MarkDuplicates. We then removed 101 regions  
402 where >50% of the samples had <20x coverage at >80% of sequenced bases,  
403 and removed 86 samples having <20x coverage at 90% of sequenced bases.  
404 We called genotypes using GATK version 3.4, following the recommended  
405 guidelines for using HaplotypeCaller<sup>41</sup> in a joint genotype calling approach. We  
406 then set genotypes with <10x coverage and QUAL<30 to missing, and excluded  
407 variants with >5% missingness. We corrected for possible sample swaps and  
408 mismatched samples by correlating the called genotypes with ImmunoChip  
409 genotypes and removing samples that did not match any ImmunoChip sample  
410 ( $r<0.95$ ), resulting in 568 final samples (including 439 for T1D, and 129 for RA).  
411 Finally, we selected variants with MAF>1%, resulting in 1,862 variants within the  
412 76 RA and T1D associated regions.

413

#### 414 **Merging imputed datasets**

415 Prior to the association analysis, we merged the data for the RA and T1D  
416 dataset, imputed with the COSMO reference panel. Since these cohorts share  
417 controls, not necessarily with identical identifiers, we first identified individuals  
418 with high shared genetic background. For this purpose, we first generated a list  
419 of LD pruned variants from the ImmunoChip genotypes using PLINK<sup>34</sup> (using --  
420 indep-pairwise 1000 100 0.2). We then used this list to determine the genetic

Westra et al.

421 similarity (unified additive relationship; UAR)<sup>42</sup> between each pair of samples  
422 across both datasets. We considered sample pairs with an UAR>0.2 genetically  
423 related and randomly selected one sample of the pair to be included from either  
424 the RA or the T1D dataset. We considered the remaining sample pairs unrelated.  
425 We finally merged genotypes and imputation probabilities from the selected  
426 samples, and recalculated the imputation INFO scores for the merged  
427 genotypes as described earlier.

428

## 429 **Association analysis framework**

### 430 **Fine-mapping and statistical analysis**

431 Due to the sample size of the datasets in our study, we limited our association  
432 analysis to variants having an overall MAF>1%, a Hardy-Weinberg P-value  
433 (HWE-P)>10<sup>-5</sup> in controls, and an overall INFO score>0.3. HWE-P was calculated  
434 using an exact test for biallelic variants, while for multi-allelic variants, Pearson's  
435 chi-squared test was applied. We then split multi-allelic variants into multiple  
436 variants, creating a single variant for each alternate allele. To test each variant  
437 for association with disease, we used logistic regression, assuming a log-linear  
438 relation between the number of alternative alleles and case-control status. We  
439 then created a null model containing covariates in order to account of  
440 population differences. In the RA dataset, the null model included the first 10  
441 principal components calculated over the genotype covariance matrix as  
442 described earlier<sup>3</sup>, and included an additional 5 covariates indicating the



Westra et al.

443 originating cohort. For T1D, we included 12 regional indicator variables in the  
444 null model as described earlier<sup>4</sup>, and an additional variable indicating the  
445 originating cohort. For each variant, we then fit an alternate model containing  
446 the genotypes. For the joint analysis, the null model included all covariates for  
447 the T1D and RA datasets and an additional covariate indicating whether the  
448 sample originated either from the RA or the T1D dataset. In order to account for  
449 imputation uncertainty, we recoded the imputation probabilities to a dosage  
450 value ranging between 0 and 2 (i.e.  $P(AB) + 2xP(BB)$ ). Finally, we calculated the  
451 p-value for the association as the difference in deviance between the alternative  
452 and null models, which follows a chi-squared distribution with 1 degree of  
453 freedom. To determine the significance of the association we calculated a  
454 study-wide Bonferroni threshold using the maximum number of tests across  
455 datasets ( $p < 7.5 \times 10^{-7} = 0.05/66,115$ ).

456

#### 457 **Definition of credible sets**

458 To define the most likely causal variant for each locus, we calculated posterior  
459 p-values using the approximate Bayesian factor (ABF)<sup>1,2</sup> under the assumption  
460 of a single causal variant per locus. Shortly, this framework assumes that the  
461 association effect sizes follow a  $N(0, V)$  distribution under  $H_0$ , with  $V$  being the  
462 standard error squared of the association. Under  $H_1$  the framework assumes a  
463 distribution following  $N(0, V+W)$ , where  $W$  is  $(\ln(1.5)/1.96)^2$ , reflecting the prior of  
464 observing an odds ratio of 1.5. The ABF for an observed effect size  $\beta$  is then

Westra et al.

465 calculated as the ratio of  $P(\beta|H_0)/P(\beta|H_1)$ , effectively measuring the probability of  
466 observing the effect size under the  $H_0$  of no association over the  $H_A$  of observing  
467 an association. Using the sum of the ABF for all variants in the locus, we  
468 calculate the posterior for variant  $i$  as:

$$469 \quad P_i = \frac{ABF_i}{\sum_{k=0}^n ABF_k}$$

470 Following calculation of the posterior p-values, we created credible sets within  
471 each locus by sorting associations descending on the basis of their posterior p-  
472 values, and including associations such that the sum of their posteriors is  $>0.9$ .

473

#### 474 **Detecting secondary associations**

475 In order to determine the presence of multiple independent effects, we  
476 performed a conditional analysis using logistic regression: for each locus with a  
477 significant association, we included the top-associated variant as a covariate in  
478 the null model, and repeated the association analysis for that locus.

479

480 For each locus with a significant secondary association, we then tested whether  
481 the observed pair of top-associated variants together provided the strongest  
482 pairwise association signal given the variants in the locus by performing an  
483 exhaustive pairwise analysis. Similarly to the normal logistic regression, the null  
484 model included the covariates for each dataset, while the alternate model

Westra et al.

485 included genotype dosages for both variants. The significance of the pairwise  
486 association was then calculated using the difference in deviance between the  
487 null and alternative models, following a chi-squared distribution with 2 degrees  
488 of freedom.

489

490 Finally, for loci with two or more independent associations, we assessed  
491 whether the risk alleles for the associated variants were located on the same  
492 haplotypes. For the independently associated variants, we derived haplotypes  
493 from the phased imputation output (e.g. 4 haplotypes for 2 independent  
494 variants), and assigned two haplotypes to each individual. We then removed all  
495 haplotypes with a frequency <1%, and removed all individuals that had any of  
496 the removed haplotypes from the analysis. By using the haplotype with the  
497 highest frequency as the reference haplotype, we assigned each individual to  
498 have either 0,1, or 2 copies of each alternative haplotype. We then used logistic  
499 regression to test each haplotype for association, assuming a log-linear  
500 relationship between the number of haplotype copies and disease status. To  
501 correct for population differences, our null model included covariates as  
502 described above.

503

504 **Functional annotation**

Westra et al.

505 **eQTLs, H3K4me3 peaks, DNase-I hypersensitive sites, enhancers and**  
506 **motifs**

507 In order to provide functional annotation for the identified variants, we assessed  
508 overlap with eQTL, H3K4me3 peaks, DNase-I hypersensitive sites, promoters  
509 and enhancers. We used eQTL from a large RNA-seq based eQTL meta-  
510 analysis using 2,116 whole blood samples<sup>43</sup>. Because many eQTL are cell type  
511 specific, and RA and T1D loci are enriched for enhancers in CD4+ T cells<sup>12</sup>, we  
512 also included a study assessing eQTL in CD4+ T cells using 461 individuals<sup>44</sup>.  
513 For each variant in a credible set, we first determined whether the variant was  
514 present in the eQTL summary statistics. We then selected the eQTL gene with  
515 the lowest eQTL p-value. For variants that were not present, we selected the  
516 eQTL snp with a linkage disequilibrium (LD)  $r^2 > 0.8$ , using the European  
517 subpopulation in 1000 genomes as a reference panel. For eQTLs with equal LD,  
518 we selected the eQTL gene with the lowest P-value.

519

520 We downloaded annotations in narrowPeak format for H3K4me3 peaks, DNase-  
521 I peaks, and ChromHMM<sup>45</sup> genome segmentations from the Roadmap  
522 epigenetics consortium<sup>46</sup>, consisting of 127 consolidated epigenomes from a  
523 large number of different cell types. We then grouped immune related cell types  
524 into an 'immune' group, and the remaining cell types in an 'other' group,  
525 resulting in two groups for DNase-I and H3K4me3 annotations. We additionally  
526 used ChromHMM annotations created using 12 imputed epigenetic marks.

Westra et al.

527 Additional to the 'immune' and 'other' groups, we further grouped ChromHMM  
528 segments for enhancers (i.e. segments with an EnhA1, EnhA2, EnhW1, EnhW2,  
529 and enHAc annotation) and promoters (i.e. segments with PromP, PromBiv,  
530 PromU, PromD1 and PromD2 annotation), resulting in four annotation groups for  
531 ChromHMM annotations. Within each group, we subsequently determined the  
532 percentage of files in which we observed overlap between an annotation and  
533 variants within the credible sets. Finally, we determined whether candidate  
534 causal variants affected protein binding motifs or transcription factor binding  
535 sites using HaploReg<sup>47</sup>.

536

537 The number of cell types in each group was different between annotations,  
538 because not all annotations were present for all cell types. Numbers of files per  
539 annotation group can be found in **Supplementary Table 14**.

540

#### 541 **ATAC-seq timeseries**

542 ATAC-seq is a method to measure chromatin accessibility using a small number  
543 of cells<sup>48</sup>. We here applied ATAC-seq to measure chromatin accessibility in a  
544 timeseries after stimulation. We used 30mL whole blood from a leukopak  
545 acquired from a healthy anonymous donor in a 20mL PBS solution. We then  
546 isolated PBMCs using Ficoll tubes and stored 500µl aliquots of 100x10<sup>6</sup> cells in  
547 liquid nitrogen. Cells were subsequently thawed, and stained with anti-biotin

Westra et al.

548 microbeads for magnetic assisted cell sorting (MACS) to select CD4<sup>+</sup> Tmem  
549 cells. Cells were resuspended and transferred to a 24 wells plate in 3ml aliquots  
550 of 6x10<sup>6</sup> cells. Cells were stimulated using Dynabeads (Human T-Activator  
551 CD3/CD28 for T Cell Expansion and Activation; Life Technologies) in a 2 cells  
552 per bead ratio. Samples of 100,000 cells were taken at 0, 1, 2, 4, 8, 12, 24, and  
553 48 hours after stimulation. Nucleosome isolation and ATAC-seq open chromatin  
554 sequencing was performed as described earlier<sup>48</sup>. Sequenced reads were  
555 mapped to the hg19 reference genome, using BWA-mem. Reads mapping to  
556 the mitochondrial genome, reads mapping to multiple genomic locations, and  
557 duplicate reads (labeled by Picard MarkDuplicates) were removed, and reads  
558 were shifted +4 and -5 bp for the reverse and forward strands respectively.  
559 Enrichment for open chromatin was determined by calling peaks using MACS  
560 v2<sup>49</sup>, using default settings.

561

## 562 **Electrophoretic mobility shift assay**

### 563 **Cell lines**

564 Lymphocytic and monocytic cell lines, Jurkat and THP-1 respectively, were  
565 obtained from the ATCC (TIB-152 and TIB-202). Jurkat cells were grown in  
566 complete RPMI (RPMI-1640, Gibco, with 10% decompemented-fetal bovine  
567 serum, penicillin and streptomycin) and THP-1 cells in complete RPMI  
568 supplemented with 2-mercaptoethanol to a final concentration of 0.05 mM. Both

Westra et al.

569 cell lines were grown in a 37°C incubator with 5% CO<sub>2</sub>.

570

571 **Electrophoretic mobility shift assay (EMSA)**

572 EMSA was performed using the LightShift Chemiluminiscent EMSA Kit (Thermo

573 Scientific). Single stranded oligonucleotides corresponding to a 30-32

574 nucleotides fragment of the human genome with the SNP of interest in the

575 middle were purchased from IDT (**Supplementary Table 18**). Single stranded

576 oligonucleotides were biotinylated using the Biotin 3'End DNA Labeling Kit

577 (Thermo Scientific) following manufacturer instructions. Double stranded

578 oligonucleotides were generated by mixing together equal amounts of biotin-

579 labeled (for probe) or unlabeled (for competitor) complementary oligonucleotides

580 and incubating them 5 min at 95°C and then 1 hour at room temperature.

581

582 Nuclear extract from Jurkat and THP-1 cells was obtained using the NE-PER™

583 Nuclear and Cytoplasmic Extraction Reagents (Thermo Scientific) following

584 manufacturer instructions. Protein extracts were dialyzed using a dialysis

585 membrane with MWCO of 12-14 KDa (Spectrum Spectra) against 1 L of dialysis

586 buffer (10 mM Tris pH 7.5, 50 mM KCl, 200 mM NaCl, 1 mM DTT, 1 mM PMSF

587 and 10% glycerol) for 16 hours at 4°C with slow stirring. Protein inhibitor

588 cocktail (Sigma-Aldrich) was added to a final concentration of 1.5x. Protein

589 concentration was measured using the Pierce BCA Protein Assay Kit (Thermo

Westra et al.

590 Scientific) and adjusted to 4 µg/µl.

591

592 The standard binding reaction contained 2 µl of 10x Binding Buffer (100 mM Tris  
593 pH 7.5, 500 mM KCl and 10 mM DTT), 2.5% glycerol, 5 mM MgCl<sub>2</sub>, 0.05% NP-  
594 40, 50 ng Poly (dl:dC), 20 fmol biotin-labeled probe and 16 µg nuclear extract in  
595 a final volume of 20 µl. For competition experiments, a 200-fold molar excess (4  
596 pmol) of unlabeled probe was added.

597

598 Binding reactions were incubated at room temperature for 30 min and loaded  
599 onto a 6 % polyacrylamide 0.5x TBE gel. After sample electrophoresis and  
600 transfer to a nylon membrane, transferred DNA was crosslinked for 10 min and  
601 the migration of the biotinylated probes and their complexes was detected by  
602 chemiluminescence followed by film exposure.

603

#### 604 **Luciferase reporter assay**

605 The double stranded oligonucleotide containing the SNP of interest (obtained as  
606 described above) was cloned downstream the luciferase gene in the luciferase  
607 reporter vector pGL3 promoter (Promega). For that, unlabeled double stranded  
608 oligonucleotides containing the rs117701653, rs35926684 or rs34552516 were  
609 amplified with specific primers containing the BamHI restriction site obtained



Westra et al.

610 from IDT (**Supplementary Table 19**). The PCR was carried out in 50  $\mu$ l reaction  
611 volume under the following program: 94°C 3 min; 10 cycles 94°C 30 sec, 60°C  
612 40 sec, 68°C 30 sec; 15 cycles 94°C 30 sec, 60°C 40 sec, 68°C 30 sec; 72°C 10  
613 min. Both PCR products and pGL3 promoter vector were digested with BamHI  
614 (New England Biolabs) for 1 h at 37°C and linearized vector was then  
615 dephosphorylated for 30 min at 37°C with the Quick Dephosphorylation kit (New  
616 England Biolabs). Digestion products were analyzed by electrophoresis in 1.2%  
617 agarose gels, and purified with QIAquick Gel Extraction Kit (Qiagen). Ligation of  
618 SNP containing fragments into the pGL3 promoter plasmid was performed in a  
619 ratio 1:50 (vector:insert) with T4 DNA ligase at 16°C overnight and transformed  
620 into JM109 competent cells (Promega). Plasmids from independent colonies  
621 were isolated using Wizard Plus SV minipreps DNA purification system  
622 (Promega) and sequenced using RV primer 4 (Promega) by Eton Bioscience. For  
623 each of the SNP, 3 colonies harboring the SNP-construct cloned “in sense” in  
624 the pGL3 promoter vector were selected for further plasmid isolation for  
625 transfection into Jurkat T cells.

626

627 Three independent transfection experiments for each construct were performed,  
628 each in duplicate.  $0.6 \times 10^4$  Jurkat cells in 0.1 ml of Opti-MEM (Gibco) were  
629 transfected with 0.8  $\mu$ g of pGL3-promoter vectors, either without insert or with  
630 any of the six SNP-containing inserts, along with 0.2  $\mu$ g of pRL-TK Renilla  
631 luciferase vector (Promega) using 1.5  $\mu$ l of Lipofectamine LTX Reagent and 1  $\mu$ l

Westra et al.

632 of PLUS Reagent (both from Invitrogen). After 16 hours of transfection,  
633 luciferase activity was measured using the Dual-Glo Luciferase assay system  
634 (Promega) following manufacturer instructions. Firefly luciferase activity was  
635 expressed as relative luciferase units (RLU) after correction for Renilla luciferase  
636 activity to adjust for transfection efficiency. Data were normalized to those cells  
637 transfected with empty pGL3-promoter vector. Results from the different clones  
638 were pooled together and expression levels compared by unpaired two-sided t-  
639 test.

Westra et al.

## 640 **Figure and Table Captions**

### 641 **Table 1**

642 Overview of causal variants in selected loci. \* identified using lower MAF  
643 threshold of 0.005. Greyed out posteriors are not significant in the primary  
644 association analysis. Functional annotations: 1 DNase1, 2 H3K3me3, 3  
645 ChromHMM Enhancers, 4 ChromHMM Promoters, 5 Haploreg Alters motif, 6  
646 Haploreg alters binding, 7 ATAC-seq, 8 eQTL T cells, 9 eQTL whole blood. n.s.:  
647 non-specific binding.

| Causal in |     |            | Posterior    |                      |      |      |          | Functional evidence |            |                       |      |                                       |
|-----------|-----|------------|--------------|----------------------|------|------|----------|---------------------|------------|-----------------------|------|---------------------------------------|
| RA        | T1D | Locus      | Variant      | Type of association  | RA   | T1D  | Combined | Variant Type        | Non-coding | Functional Annotation | EMSA | Luciferase assay                      |
| x         |     | DNASE1L3   | rs35677470   | Primary              | 0.81 |      |          | R206C               |            | 3,5,8,9               |      |                                       |
|           |     | CD28/CTLA4 | rs3087243    | Primary (T1D)        | 0.01 | 0.46 | 0.91     |                     | x          | 2,3,6                 | n.s. |                                       |
| x         |     |            | rs117701653  | Primary (RA)         | 0.82 |      | 0.00     |                     | x          | 1,2,3,5,7             | C>A  | A>control (p=0.0024), C>A (p=0.0017)  |
| x         |     |            | rs55686954   | Primary (RA)         | 0.14 |      |          |                     | x          | 2,3,4                 | A>G  | n.s.                                  |
| x         |     | TNFAIP3    | rs35926684   | Primary              | 0.24 |      | 0.11     | Indel               | x          | 3,5                   | GA>G | G>control (p=0.0124), GA>G (p=0.0533) |
|           | x   | MEG3       | rs34552516   | Primary              |      | 0.37 |          | Indel               | x          | 3,5                   | TC>T | T>control (p=0.039), TC>T (p=0.0454)  |
| x         | x   | PTPN22     | rs2476601    | Primary              | 0.52 | 0.92 | 0.90     | R620W               |            | 5,6,8,9               |      |                                       |
| x         | x   | TYK2       | rs34536443 * | Primary              | 0.97 | 0.98 | 1.00     | P1104A              |            | 5,9                   |      |                                       |
| x         |     |            | rs35018800 * | Secondary (RA)       |      |      |          | A928V               |            | 5,6                   |      |                                       |
|           | x   |            | rs12720356 * | Secondary (Combined) |      |      |          | I684S               |            |                       |      |                                       |
|           | x   | SH2B3      | rs3184504    | Primary              |      | 0.33 |          | R262W               |            | 5,9                   |      |                                       |
|           |     | ANKRD55    | rs11377254   | Primary              | 0.88 |      | 0.85     | Indel               | x          | 1,2,3,4,5,6,7         | n.s. |                                       |
|           |     | REL/PUS10  | rs35149334   | Primary              | 0.94 |      |          |                     | x          | 5                     | n.s. |                                       |
|           |     | IL2RA      | rs61839660   | Primary              |      | 0.85 |          |                     | x          | 1,2,3,5,6,7,9         | n.s. |                                       |
|           | x   | SIRPG      | rs6043409    | Primary              |      | 0.25 |          | V263A               |            | 5,8,9                 |      |                                       |

1 DNase1, 2 H3K3me3, 3 ChromHMM Enhancers, 4 ChromHMM Promoters, 5 Haploreg Alters motif, 6 Haploreg alters binding, 7 Atac-seq, 8 eQTL T-cells, 9 eQTL whole blood

Westra et al.

648 **Figure 1**

649 We imputed our datasets with different reference panels: the European  
650 subpopulation of 1000 genomes (EUR), full 1000 genomes (COSMO), and the  
651 Haplotype Reference Consortium (HRC). A) We sequenced 799 1kb regions in  
652 568 individuals with ImmunoChip genotypes, and called 1,862 common  
653 (MAF>1%) variants. Imputation with COSMO and EUR recovers 96% of these  
654 variants, while HRC imputation recovers 90%. We calculated imputation  
655 accuracy by correlating imputed genotypes with genotypes called from the  
656 sequencing experiment (genomic  $r^2$ ). At  $r^2>0.5$ , COSMO and EUR recover 93%  
657 of variants, while HRC recovers 86%. B) Imputation quality scores (INFO) for  
658 each reference panel in the RA dataset. COSMO shows highest increase in  
659 number of variants (MAF>1%) after imputation (2.5x; INFO>0.3) compared to  
660 EUR (2.3x) and HRC (1.9x).

Figure 1

A

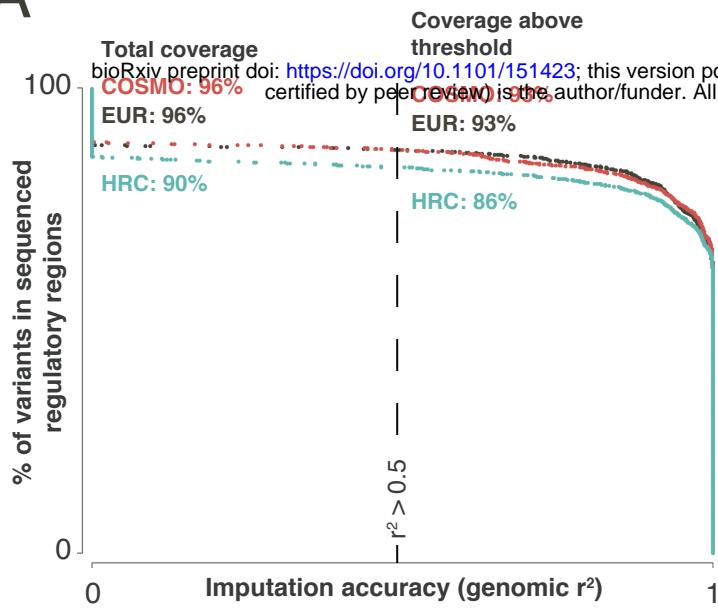

B

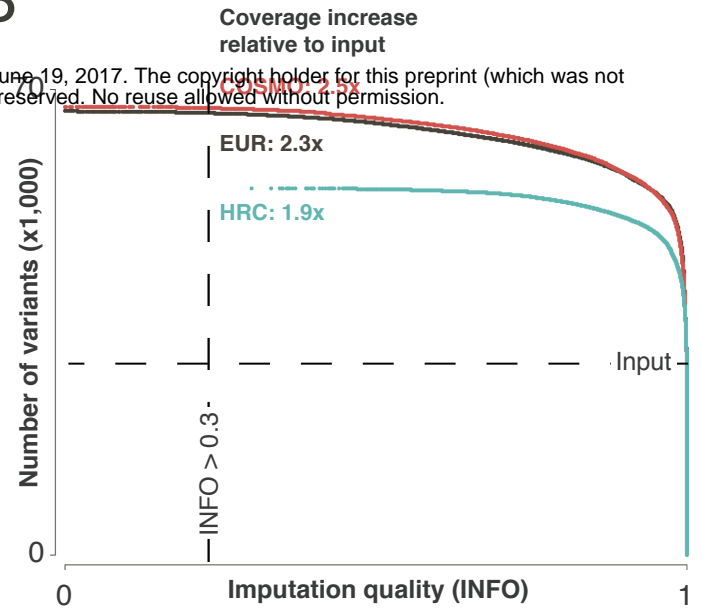

Westra et al.

661 **Figure 2**

662 We used the approximate Bayesian factor to determine 90% credible sets within  
663 significant loci. A) A number of loci have a shared signal between diseases.  
664 Inner ring of dots indicates whether locus has  $\leq 10$  variants in credible set and  
665 has a significant association signal, and is open otherwise. Middle ring shows  
666 variants in each credible set. Highlighted segments indicate loci with causal  
667 variant. Color intensity indicates posterior probability and grey when not  
668 significant. Outer ring shows indel, promoter and missense coding annotation  
669 for each variant in credible set. B) We are able to narrow down the list of causal  
670 variants 5 in 8 out of 20 significant RA loci, and 11 out of 36 significant T1D loci.  
671 For both diseases, we find two loci that are explained by a single variant. C)  
672 From the credible sets, we defined groups of interesting loci, based on the  
673 presence of a high posterior missense variant ( $>0.2$ ), indel ( $>0.2$ ) or SNP ( $>0.8$ ).  
674 We applied several follow-up analyses to these loci, including conditional  
675 analysis, exhaustive pairwise and haplotype analysis when a secondary signal  
676 was present, and functional analysis (EMSA) for non-coding loci.

# Figure 2

## A

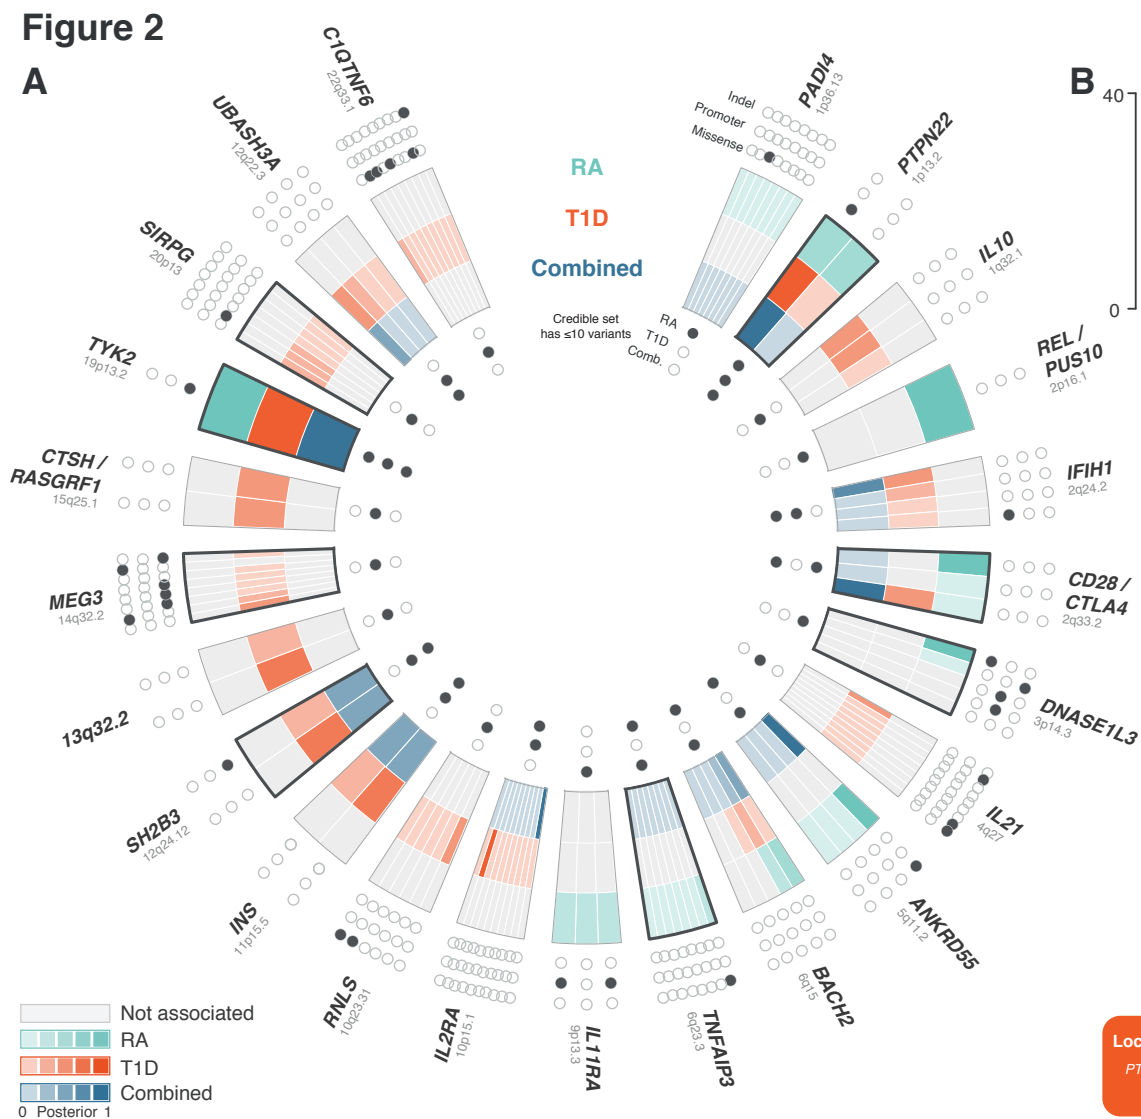

## B

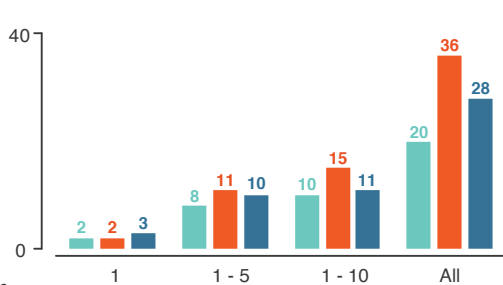

## C

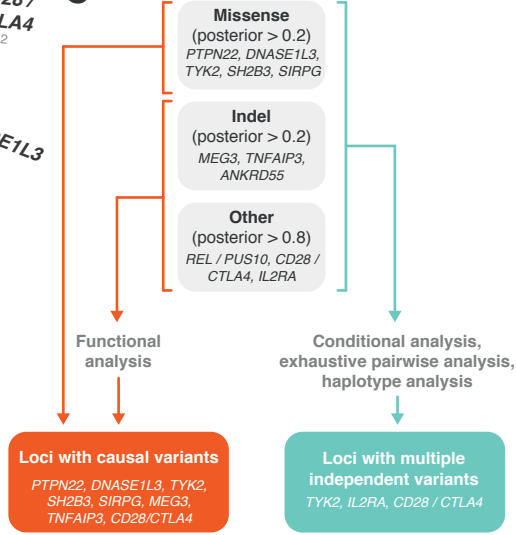



Westra et al.

677 **Figure 3**

678 Analysis in the *CD28/CTLA4* locus. A) The regional association plot for the  
679 combined analysis shows a single variant (rs3087243), near *CTLA4*, in the  
680 credible set. Conditioning on rs30872043 reveals rs117701653 as an  
681 independent association. Color indicates LD with top-associated variant. Square  
682 indicates presence in credible set. B) Exhaustive pairwise analysis shows that  
683 rs3087243+rs117701653 pair has strongest association. Green color indicates  
684  $-\text{Log}_{10}(\text{pairwise p-value})$ , purple color indicates pairwise LD. C) Haplotype  
685 analysis using rs30872043 and rs117701653, using the AG haplotype as  
686 reference. The C allele of rs117701653 shows largest decrease in risk in RA, and  
687 the A of rs30872043 in T1D. D) EMSA using probes for rs117701653 and  
688 rs3087243 as a functional follow-up in Jurkat T cells. We observe an extra band  
689 in the lane with protein sample and biotin probe for the C-allele that is not  
690 observed for the other probes. The band disappears when adding non-labeled  
691 probe, suggesting competition between labeled and non-labeled probe for  
692 binding protein. E) Luciferase assay for rs117701653 using pGL3 plasmids in  
693 Jurkat T cells. We calculated relative luciferase activity units (RLU) using the  
694 activity of the empty plasmid (pGL3) as reference, and observed significant  
695 increase in luciferase activity for the A allele, and a further significant increase in  
696 luciferase activity for the C allele, which verifies that both alleles affect protein  
697 binding, albeit likely with different affinities.

# Figure 3 - *CD28 / CTLA4*

## A RA, T1D Combined

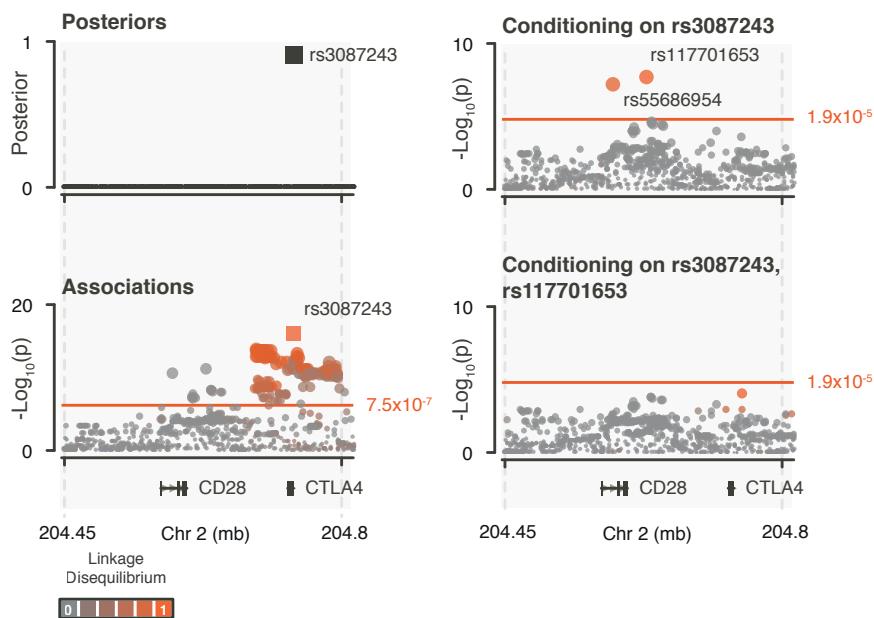

## B Rheumatoid Arthritis

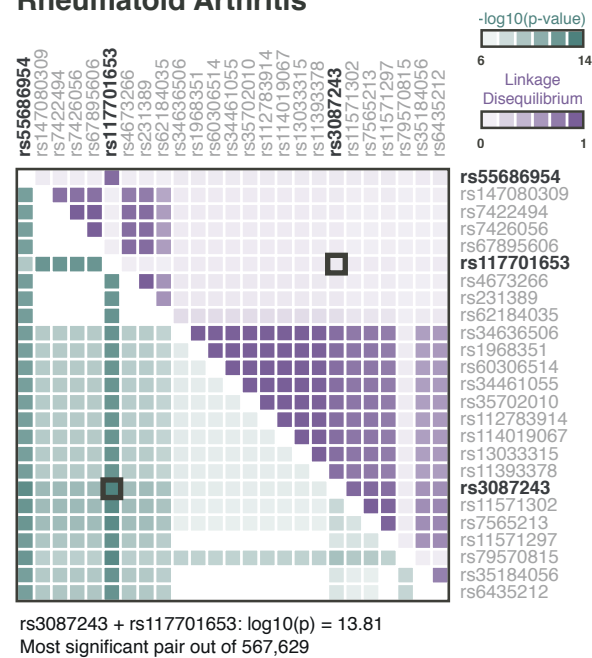

## C

| Dataset | Frequency | Odds-ratio | Cases Controls |             |
|---------|-----------|------------|----------------|-------------|
|         |           |            | 0.6            | 1           |
| A   G   | Combined  | 0.588      | 0.554          | (reference) |
|         | RA        | 0.584      | 0.552          | (reference) |
|         | T1D       | 0.594      | 0.554          | (reference) |
| C   A   | Combined  | 0.027      | 0.036          |             |
|         | RA        | 0.027      | 0.036          |             |
|         | T1D       | 0.389      | 0.412          |             |
| A   A   | Combined  | 0.385      | 0.41           |             |
|         | RA        | 0.029      | 0.035          |             |
|         | T1D       | 0.377      | 0.412          |             |

## D

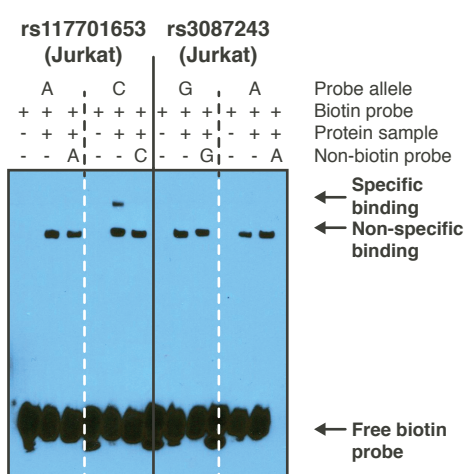

## E

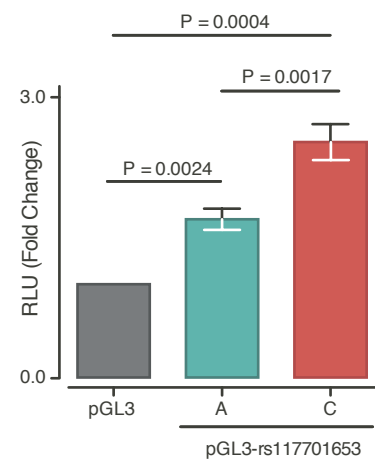

Westra et al.

698 **Figure 4**

699 Analysis in the *TNFAIP3* locus. A) The variant with the strongest posterior in this  
700 locus is rs35926684, a G/GA indel, associated with RA. Conditional on  
701 rs35926684, we observe a significant secondary association with rs58721818.  
702 B) Exhaustive pairwise association analysis in RA indicates that there are 6 pairs  
703 with a lower p-value than rs35926684+rs58721818, although the top-associated  
704 pair (rs69220220+rs58721818) has an equivalent p-value ( $-\log_{10}(p)=13.94$  vs  
705 14.21). C) Haplotype analysis with rs35926684+rs58721818, and previously  
706 reported variants rs6920220 and rs5029937 shows that rs35926684 and  
707 previously reported top variant rs6920220 are often located on the same  
708 haplotype (GAGC), although a rare haplotype exists with only the alternative  
709 allele of rs35926684, which causes a similar increase in risk, although with larger  
710 standard error. D) EMSA analysis using a G and GA probe for rs35926684. We  
711 observe an extra band in the lane with protein sample and biotin probe for the  
712 GA-allele that is not observed for the other probes. The band disappears when  
713 adding non-labeled probe, suggesting competition between labeled and non-  
714 labeled probe for binding protein. E) Luciferase assay for rs35926684 shows  
715 that both G and GA consequently alter luciferase expression.

# Figure 4 - *TNFAIP3*

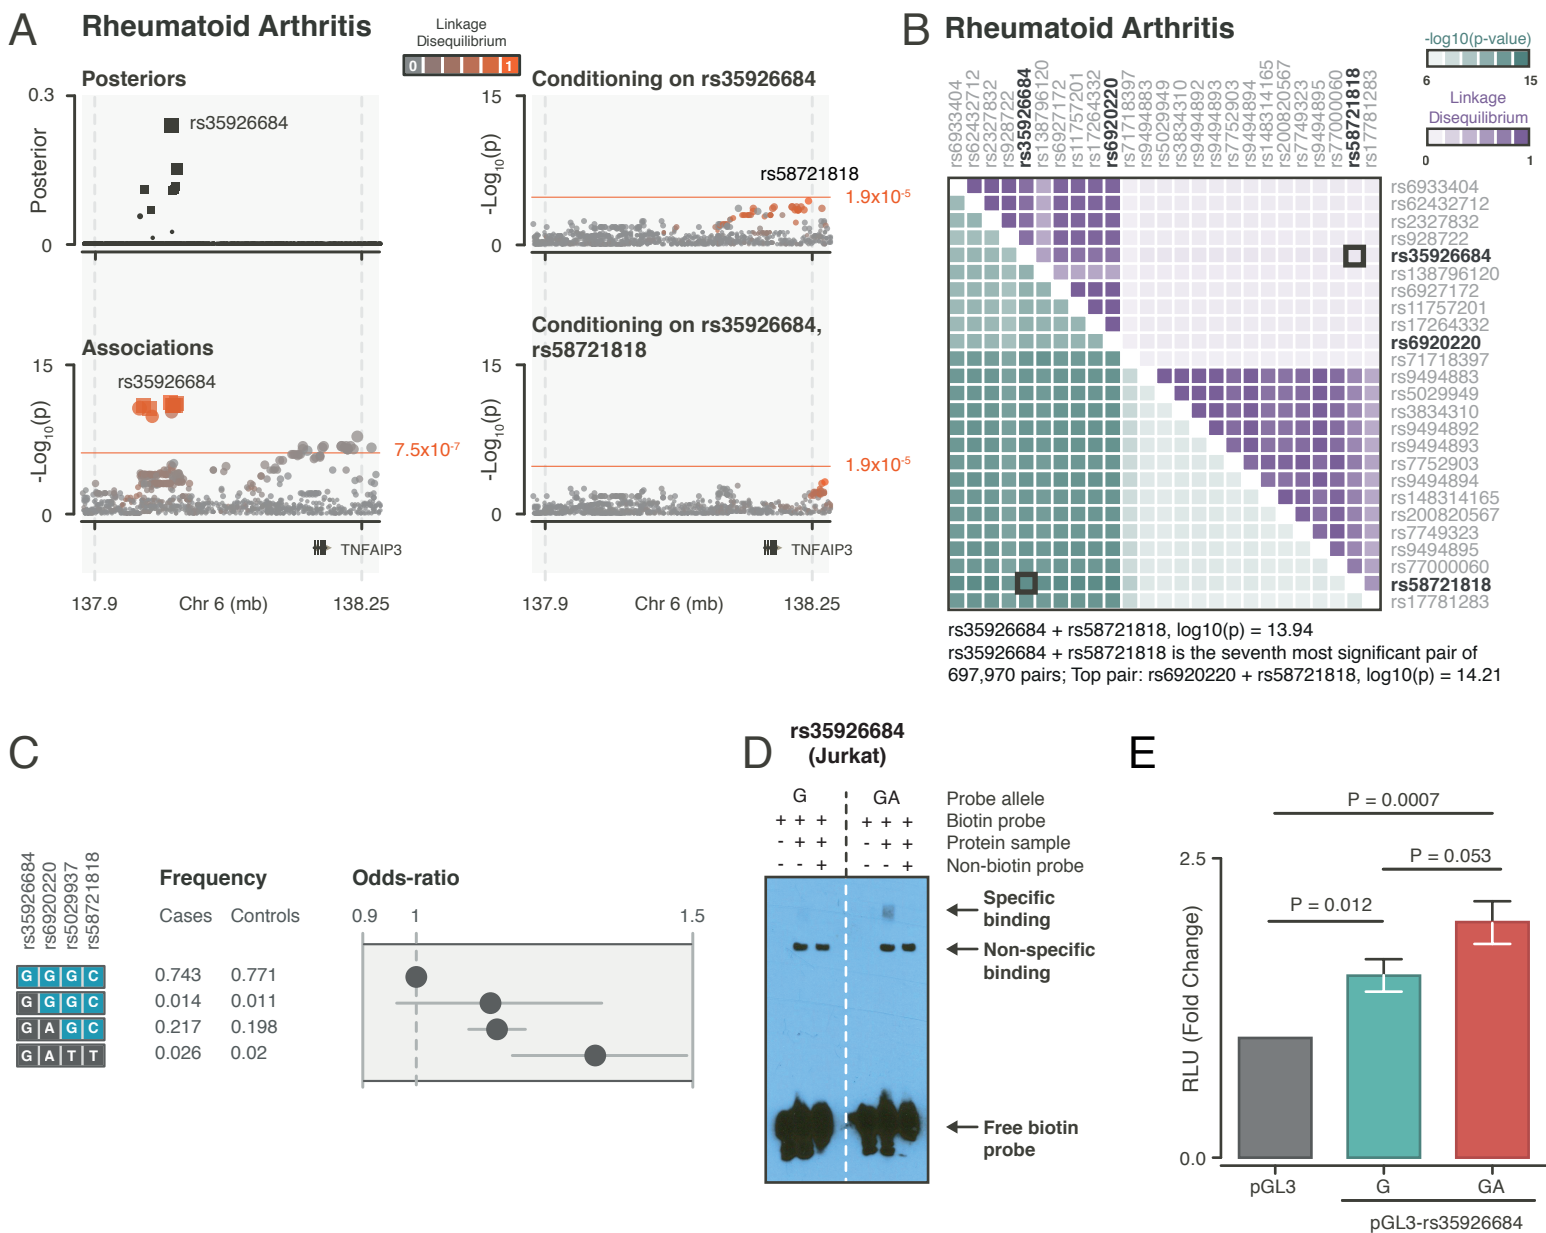

Westra et al.

716 **Figure 5**

717 Analysis in the *MEG3* locus. A) Region plot for the *MEG3* locus in T1D. We  
718 observe two variants in the credible set (rs56994090 and indel rs34552516;  
719 indicated by squares). We did not observe secondary signals when conditioning  
720 on rs56994090. B) EMSA analysis for rs34552516 and rs56994090. Left: the  
721 TC allele of rs34552516 shows a band that disappears when adding non-labeled  
722 TC probe as competitor, suggesting specific binding. C) Consequently, a  
723 luciferase assay for rs34552516 shows an increase of luciferase activity for the  
724 TC allele relative to the T allele and empty vector.

# Figure 5 - *MEG3*

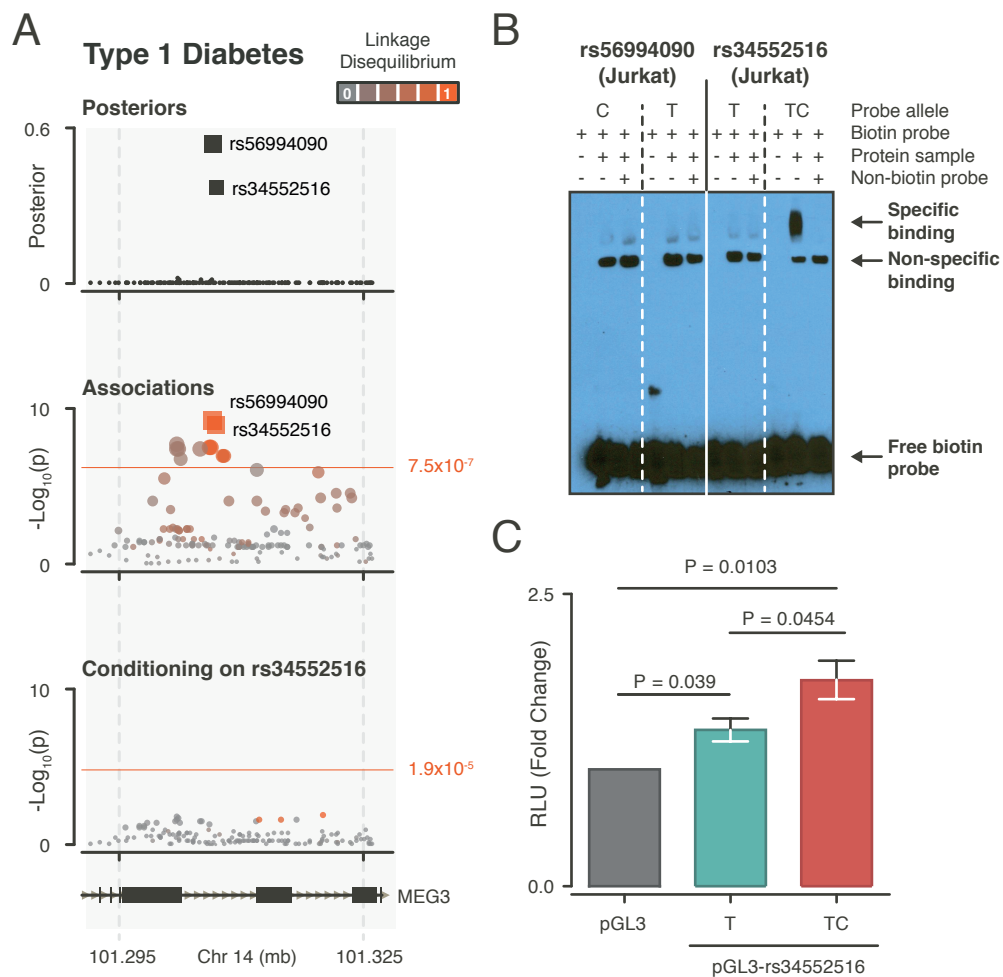

Westra et al.

## 725 **Supplementary Figures**

### 726 **Supplementary Figure 1**

727 A) Out of the 902 sequenced regions, 799 had >20x coverage at 80% of  
728 sequenced bases in at least 50% of the samples. B) 87 samples had less than  
729 20x coverage in at least 90% of the sequences bases. C) The 1,170 variants out  
730 of the 1,862 called variants that overlapped within 568 ImmunoChip genotyped  
731 individuals were highly correlated for both RA and T1D

732

### 733 **Supplementary Figure 2**

734 Top: Imputation quality (INFO) scores for the RA and T1D datasets, imputed with  
735 the European subpopulation of 1000 genomes (EUR), full 1000 genomes  
736 (COSMO), and the Haplotype Reference Consortium (HRC) reference panels. In  
737 T1D, HRC imputation was performed in three ways: using EAGLE (HRC /  
738 EAGLE) or SHAPEIT (HRC / SHAPEIT) for phasing on the Sanger Institute  
739 imputation server, or using EAGLE for phasing and imputation on the Michigan  
740 imputation server (HRC / EAGLE / MICHIGAN). From left to right: comparing  
741 variants with MAF>1%, comparing variants with MAF>1% but excluding indels,  
742 and comparing all variants. For MAF>1% variants, COSMO outperforms both  
743 EUR and HRC.

744

745

Westra et al.

746 **Supplementary Figure 3**

747 Imputation accuracy (genomic  $r^2$ ) for the RA and T1D datasets, imputed with the  
748 European subpopulation of 1000 genomes (EUR), full 1000 genomes (COSMO),  
749 and the Haplotype Reference Consortium (HRC) reference panels. Genomic  $r^2$   
750 was calculated by correlating imputed dosages with sequenced variants for the  
751 same individuals. In T1D, HRC imputation was performed in three ways: using  
752 EAGLE (HRC / EAGLE) or SHAPEIT (HRC / SHAPEIT) for phasing on the Sanger  
753 Institute imputation server, or using EAGLE for phasing and imputation on the  
754 Michigan imputation server (HRC / EAGLE / MICHIGAN). From left to right:  
755 comparing variants with  $MAF > 1\%$ , comparing variants with  $MAF > 1\%$  but  
756 excluding indels, and comparing all variants. In all cases, COSMO outperforms  
757 both EUR and HRC.

758

759 **Supplementary Figure 4**

760 We compared imputation quality (INFO score) with imputation accuracy  
761 (genomic  $r^2$ ) in the T1D dataset, and observed a strong correlation ( $r^2=0.82$ ).

762

763 **Supplementary Figure 5**

764 In the T1D dataset, 72 variants ( $MAF > 1\%$ ) that were present in our gold  
765 standard genotype dataset were not present after imputation. A) The majority  
766 (69%) of these variants were indels and B) variants of low allele frequency (44%



Westra et al.

767 with MAF<5%). C) For those variants with a low MAF (MAF<1%), or with a low  
768 correlation with gold standard genotypes ( $r^2<0.5$ ), the majority (77%) were low  
769 frequency variants.

770

### 771 **Supplementary Figure 6**

772 In 66% of the 76 tested loci, the association statistics (Z-scores) between RA  
773 and T1D are positively correlated.

774

### 775 **Supplementary Figure 7**

776 Region plot for the *PTPN22* locus. The credible set consists two variants  
777 (indicated by squares): we observe two significant ( $p<7.5\times 10^{-7}$ ) associations in  
778 RA and T1D. These associations include rs2476601, which causes a R620W  
779 coding change in the PTPN22 protein and has a high posterior (0.78) in the  
780 combined analysis. No significant secondary signals are observed when  
781 conditioning on rs2476601. Color indicates LD between top associated variant.

782

### 783 **Supplementary Figure 8**

784 A) Region plot for the *TYK2* locus. Considering previous analysis in this region,  
785 we decreased the MAF threshold for this region to 0.5%. For each analysis, the  
786 credible set consists of a single variant, rs34536443, causing a P1104A change in  
787 TYK2. Conditional on P1104A, we observe a secondary association from rs35018800 in

Westra et al.

788 RA, causing a A928V change in TYK2. Further conditioning indicates a tertiary  
789 association from rs12720356 in the combined analysis, causing a I684S change in  
790 TYK2. Finally, conditional on these three coding variants, we observe a quaternary  
791 association from rs35074907. B) Top 25 SNPs as identified by pairwise exhaustive  
792 analysis. In RA and the combined analysis, rs34536443+rs35018800 is the top  
793 associated pair. In T1D, however, there are 138 pairs with a lower p-value, with  
794 rs35018800 + rs12720356 having the strongest association. C) Haplotype analysis  
795 using rs34536443, rs12720356, rs35018800, and rs35074907 using the GGAG  
796 haplotype as a reference. All haplotypes confer independent relative risk reduction,  
797 except for GGAA, which increases risk in T1D, relative to the reference haplotype.

798

#### 799 **Supplementary Figure 9**

800 Region plot for the *SH2B3* locus. The credible set for T1D contains two variants,  
801 including rs3184504, causing a R262W change in SH2B3. Conditioning on  
802 rs3184504, we do not observe a secondary association.

803

#### 804 **Supplementary Figure 10**

805 Region plot for the *DNASE1L3* locus. The credible set consists of two variants in  
806 RA, including rs35677470, causing a R206C coding change in the DNASE1L3  
807 protein. No significant secondary signals are observed when conditioning on  
808 rs35677470.

809

Westra et al.

810 **Supplementary Figure 11**

811 Region plot for the *SIRPG* locus. The credible set consists of seven variants in  
812 T1D, including rs6043409, causing a V263A coding change in the SIRPG  
813 protein. No significant secondary signals are observed when conditioning on  
814 rs6043409.

815

816 **Supplementary Figure 12**

817 Region plot for the *ANKRD55* locus. We did not observe a significant  
818 association for T1D, while for RA, the credible set contained two variants:  
819 rs11377254 and rs7731626 (indicated by squares). No secondary signals were  
820 observed when conditioning on rs11377254.

821

822 **Supplementary Figure 13**

823 Region plot for the *REL* locus. The credible set for RA contains a single variant  
824 with strong posterior (rs35149334), but shows no association in T1D.  
825 Conditioning on rs35149334, we do not observe a secondary association.

826

827 **Supplementary Figure 14**

828 Region plot for the *IL2RA* locus. The credible set for T1D contains two variants,  
829 with rs61839660 having the largest posterior (0.85). When performing

Westra et al.

830 conditional analysis, a secondary association is observed from rs4747846, a  
831 tertiary association from rs41295159, and finally, a quaternary association from  
832 rs704778. B) Pairwise exhaustive analysis in T1D shows that there are 0 pairs  
833 with a lower association p-value than rs61839660 + rs474846. C) Haplotype  
834 analysis suggests independent and opposite effects from haplotypes carrying  
835 rs61839660 and rs706778 alternate alleles.

836

### 837 **Supplementary Figure 15**

838 A) Region plots for the *CD28/CTLA4* locus: rs3087243, near *CTLA4*, has an  
839 increased posterior in the combined analysis compared with T1D, indicating a  
840 shared effect. In RA, rs117701653, near *CD28*, has the highest posterior. Both  
841 rs3087243 and rs11701653 are independently associated with RA, but not T1D.  
842 B) Exhaustive pairwise analysis for RA shows that the rs117701653+rs3087243  
843 pair has the strongest association for RA, but not T1D. C) Left to right: specific  
844 band in EMSA for rs117701653 C allele can be competed away using non-  
845 labeled A probe, indicating specific binding for A allele as well. Dose titration of  
846 labeled C and A allele probes (quantities in fmol) indicates that A allele also  
847 shows allele specific binding at higher probe quantities. EMSA in THP-1  
848 monocyte cells does not show band for specific binding that is visible in Jurkat  
849 T cells for the rs117701653 C allele. EMSA for rs55686954 shows allele specific  
850 binding for the A allele. D) When performing a luciferase assay on rs117701653

Westra et al.

851 and rs55686954, we observe allele specific enhancer activity for rs117701653  
852 but not rs55686954.

853

#### 854 **Supplementary Figure 16**

855 Promoter capture hi-C plots for the *CD28/CTLA4*, *TNAIP3* and *MEG3* loci show  
856 multiple contacts between bait sequences containing potential causal variants  
857 and downstream genomic regions. Figures adapted from <http://www.chicp.org/>

858

#### 859 **Supplementary Figure 17**

860 Region plot for the *TNFAIP3* locus showing (from top to bottom) genes,  
861 posterior probabilities, and association p-values. The credible set for RA  
862 contains 8 variants, including indel rs35926684 (indicated by squares). No  
863 significant association was observed for T1D. When conditioning on  
864 rs35926684, a suggestive secondary signal was observed from rs58721818. B)  
865 Exhaustive pairwise testing shows that there are 6 pairs having a stronger  
866 association with RA than rs35926684 + rs58721818, with rs6920220 +  
867 rs58721818 showing the strongest association. C) Left to right: EMSA dose  
868 titration of labeled G and GA allele probes for rs355926684 (quantities in fmol)  
869 indicates that G allele also shows allele specific binding at higher probe  
870 quantities. Specific binding for the GA allele is not observed in THP-1 monocyte  
871 cells. EMSA in Jurkat cells for rs6920220 does not indicate specific binding.

Westra et al.

872

873 **Supplementary Figure 18**

874 A) Region plot for the *MEG3* locus showing (from top to bottom) genes,  
875 posterior probabilities, and association p-values. We observe two variants in the  
876 credible set (rs56994090 and indel rs34552516; indicated by squares) for T1D,  
877 but no association in RA. We did not observe secondary signals when  
878 conditioning on rs56994090. B) EMSA in Jurkat T cells and THP-1 monocyte  
879 cells, shows no specific binding for the TC allele of rs34552516.

880

881 **Supplementary Tables**

882 **Supplementary Table 1**

883 Overview of the cases and controls for each of the cohorts included in this  
884 study.

885

886 **Supplementary Table 2**

887 List of ImmunoChip regions, and regions with significant associations with RA or  
888 T1D published in previous studies.

889

890 **Supplementary Table 3**

891 Statistics for variants called from targeted sequencing experiment (MAF > 1%).

Westra et al.

892

893 **Supplementary Table 4**

894 Imputation accuracy as determined by correlating imputed genotype dosages  
895 with genotypes called from targeted sequencing experiment for variants that are  
896 both present and absent on ImmunoChip.

897

898 **Supplementary Table 5**

899 Differences between imputation reference panels, by testing the difference in  
900 imputation accuracy (t-test).

901

902 **Supplementary Table 6**

903 Number of variants used as input for imputation, and output of imputation, at  
904 different imputation quality (INFO) score and allele frequency thresholds for each  
905 imputation reference panel.

906

907 **Supplementary Table 7**

908 Comparison of results presented in Okada et al. with the RA association  
909 analysis, for regions significant in this study. For each study, we compared the  
910 strongest association per region. Gt: genotyped variant.

911

Westra et al.

912 **Supplementary Table 8**

913 Comparison of results presented in Onengut-Gumuscu et al. with the T1D  
914 association analysis, for regions significant in this study. For each study, we  
915 compared the strongest association per region. Gt: genotyped variant.

916

917 **Supplementary Table 9**

918 Correlations between RA and T1D association statistic Z-scores for the 76  
919 tested loci.

920

921 **Supplementary Table 10**

922 Comparison of results from the combined analysis with the RA association  
923 analysis, for regions significant in this study. For each analysis, we compared  
924 the association with the strongest association per region. Gt: genotyped variant.

925

926 **Supplementary Table 11**

927 Comparison of results from the combined analysis with the T1D association  
928 analysis, for regions significant in this study. For each analysis, we compared  
929 the association with the strongest association per region. Gt: genotyped variant.

930

931 **Supplementary Table 12**



Westra et al.

932 90% credible sets identified in this study: association results for regions that  
933 have  $\leq 10$  variants in the 90% credible set and are significant in either RA, T1D,  
934 or the combined analysis.

935

936 **Supplementary Table 13**

937 Conditional analysis results for the RA, T1D and combined analysis.

938

939 **Supplementary Table 14**

940 Haploreg annotations for candidate variants.

941

942 **Supplementary Table 15**

943 Overlap DNase-I, H3K4me3, ChromHMM enhancers and ChromHMM  
944 promoters for both immune cell type groups and other cell types.

945

946 **Supplementary Table 16**

947 Overlap of credible sets with ATAC-seq peaks called from time course  
948 experiment in CD4+ T cells.

949

950 **Supplementary Table 17**

Westra et al.

951 eQTL overlap for the 90% credible sets in the RA, T1D, and combined analysis.

952

953 **Supplementary Table 18**

954 Oligonucleotide probes used during EMSA analysis.

955

956 **Supplementary Table 19**

957 Primers used for cloning Luciferase assay plasmids.

958

Westra et al.

## 959 **References**

- 960 1. Maller, J. B. *et al.* Bayesian refinement of association signals for 14 loci in  
961 3 common diseases. *Nat. Genet.* **44**, 1294–301 (2012).
- 962 2. Wakefield, J. A Bayesian Measure of the Probability of False Discovery in  
963 Molecular Genetic Epidemiology Studies (DOI:10.1086/519024). *Am. J.*  
964 *Hum. Genet.* **83**, 424 (2008).
- 965 3. Eyre, S. *et al.* High-density genetic mapping identifies new susceptibility  
966 loci for rheumatoid arthritis. *Nat. Genet.* **44**, 1336–40 (2012).
- 967 4. Onengut-Gumuscu, S. *et al.* Fine mapping of type 1 diabetes susceptibility  
968 loci and evidence for colocalization of causal variants with lymphoid gene  
969 enhancers. *Nat. Genet.* **47**, 381–386 (2015).
- 970 5. Klareskog, L., Catrina, A. I. & Paget, S. Rheumatoid arthritis. *Lancet* **373**,  
971 659–672 (2009).
- 972 6. Palmer, J. P. *et al.* Insulin antibodies in insulin-dependent diabetics before  
973 insulin treatment. *Science* **222**, 1337–9 (1983).
- 974 7. Baekkeskov, S. *et al.* Identification of the 64K autoantigen in insulin-  
975 dependent diabetes as the GABA-synthesizing enzyme glutamic acid  
976 decarboxylase. *Nature* **347**, 151–156 (1990).
- 977 8. Okada, Y. *et al.* Genetics of rheumatoid arthritis contributes to biology and  
978 drug discovery. *Nature* **506**, 376–81 (2014).
- 979 9. Huang, H. *et al.* Association mapping of inflammatory bowel disease loci

Westra et al.

- 980 to single variant resolution. *bioRxiv* 28688 (2015). doi:10.1101/028688
- 981 10. Gaulton, K. J. *et al.* Genetic fine mapping and genomic annotation defines  
982 causal mechanisms at type 2 diabetes susceptibility loci. *Nat. Genet.* **47**,  
983 1415–1425 (2015).
- 984 11. Farh, K. K. *et al.* Genetic and epigenetic fine mapping of causal  
985 autoimmune disease variants. *Nature* **518**, 337–343 (2015).
- 986 12. Trynka, G. *et al.* Chromatin marks identify critical cell types for fine  
987 mapping complex trait variants. *Nat. Genet.* **45**, 124–30 (2013).
- 988 13. McCarthy, S. *et al.* A reference panel of 64,976 haplotypes for genotype  
989 imputation. *Nat. Genet.* **48**, 1279–1283 (2016).
- 990 14. Abecasis, G. R. *et al.* A map of human genome variation from population-  
991 scale sequencing. *Nature* **467**, 1061–73 (2010).
- 992 15. Begovich, A. B. *et al.* A missense single-nucleotide polymorphism in a  
993 gene encoding a protein tyrosine phosphatase (PTPN22) is associated  
994 with rheumatoid arthritis. *Am. J. Hum. Genet.* **75**, 330–7 (2004).
- 995 16. Bottini, N. *et al.* A functional variant of lymphoid tyrosine phosphatase is  
996 associated with type I diabetes. *Nat. Genet.* **36**, 337–338 (2004).
- 997 17. Diogo, D. *et al.* TYK2 protein-coding variants protect against rheumatoid  
998 arthritis and autoimmunity, with no evidence of major pleiotropic effects  
999 on non-autoimmune complex traits. *PLoS One* **10**, e0122271 (2015).
- 1000 18. Zochling, J. *et al.* An Immunochip-based interrogation of scleroderma

Westra et al.

- 1001 susceptibility variants identifies a novel association at DNASE1L3. *Arthritis*  
1002 *Res. Ther.* **16**, (2014).
- 1003 19. Al-Mayouf, S. M. *et al.* Loss-of-function variant in DNASE1L3 causes a  
1004 familial form of systemic lupus erythematosus. *Nat. Genet.* **43**, 1186–1188  
1005 (2011).
- 1006 20. Ueki, M. *et al.* Caucasian-specific allele in non-synonymous single  
1007 nucleotide polymorphisms of the gene encoding deoxyribonuclease I-like  
1008 3, potentially relevant to autoimmunity, produces an inactive enzyme. *Clin.*  
1009 *Chim. Acta* **407**, 20–24 (2009).
- 1010 21. Fortune, M. D. *et al.* Statistical colocalization of genetic risk variants for  
1011 related autoimmune diseases in the context of common controls. *Nat.*  
1012 *Genet.* **47**, 839–46 (2015).
- 1013 22. Aguet, F. *et al.* Local genetic effects on gene expression across 44 human  
1014 tissues. *bioRxiv* (2016).
- 1015 23. Javierre, B. M. *et al.* Lineage-Specific Genome Architecture Links  
1016 Enhancers and Non-coding Disease Variants to Target Gene Promoters.  
1017 *Cell* **167**, 1369–1384.e19 (2016).
- 1018 24. Tsoi, L. C. *et al.* Identification of 15 new psoriasis susceptibility loci  
1019 highlights the role of innate immunity. *Nat. Genet.* **44**, 1341–1348 (2012).
- 1020 25. Jostins, L. *et al.* Host–microbe interactions have shaped the genetic  
1021 architecture of inflammatory bowel disease. *Nature* **491**, 119–124 (2012).

Westra et al.

- 1022 26. Beecham, A. H. *et al.* Analysis of immune-related loci identifies 48 new  
1023 susceptibility variants for multiple sclerosis. *Nat. Genet.* **45**, 1353–1360  
1024 (2013).
- 1025 27. Lessard, C. J. *et al.* Variants at multiple loci implicated in both innate and  
1026 adaptive immune responses are associated with Sjögren’s syndrome. *Nat.*  
1027 *Genet.* **45**, 1284–1292 (2013).
- 1028 28. Cordell, H. J. *et al.* International genome-wide meta-analysis identifies  
1029 new primary biliary cirrhosis risk loci and targetable pathogenic pathways.  
1030 *Nat. Commun.* **6**, 8019 (2015).
- 1031 29. Bentham, J. *et al.* Genetic association analyses implicate aberrant  
1032 regulation of innate and adaptive immunity genes in the pathogenesis of  
1033 systemic lupus erythematosus. *Nat. Genet.* **47**, 1457–1464 (2015).
- 1034 30. Trynka, G. *et al.* Dense genotyping identifies and localizes multiple  
1035 common and rare variant association signals in celiac disease. *Nat. Genet.*  
1036 **43**, 1193–201 (2011).
- 1037 31. McGovern, A. *et al.* Capture Hi-C identifies a novel causal gene, IL20RA,  
1038 in the pan-autoimmune genetic susceptibility region 6q23. *Genome Biol.*  
1039 **17**, 212 (2016).
- 1040 32. Zhou, Y. *et al.* Activation of p53 by MEG3 Non-coding RNA. *J. Biol. Chem.*  
1041 **282**, 24731–24742 (2007).
- 1042 33. Wallace, C. *et al.* The imprinted DLK1-MEG3 gene region on chromosome

Westra et al.

- 1043 14q32.2 alters susceptibility to type 1 diabetes. *Nat. Genet.* **42**, 68–71  
1044 (2010).
- 1045 34. Purcell, S. *et al.* PLINK: a tool set for whole-genome association and  
1046 population-based linkage analyses. *Am. J. Hum. Genet.* **81**, 559–75  
1047 (2007).
- 1048 35. Browning, B. L. & Browning, S. R. Genotype Imputation with Millions of  
1049 Reference Samples. *Am. J. Hum. Genet.* **98**, 116–126 (2016).
- 1050 36. Loh, P.-R. *et al.* Reference-based phasing using the Haplotype Reference  
1051 Consortium panel. *Nat. Genet.* **48**, 1443–1448 (2016).
- 1052 37. Delaneau, O., Marchini, J. & Zagury, J.-F. A linear complexity phasing  
1053 method for thousands of genomes. *Nat. Methods* **9**, 179–181 (2011).
- 1054 38. Durbin, R. Efficient haplotype matching and storage using the positional  
1055 Burrows-Wheeler transform (PBWT). *Bioinformatics* **30**, 1266–72 (2014).
- 1056 39. Fuchsberger, C., Abecasis, G. R. & Hinds, D. A. minimac2: faster genotype  
1057 imputation. *Bioinformatics* **31**, 782–4 (2015).
- 1058 40. Li, H. & Durbin, R. Fast and accurate short read alignment with Burrows-  
1059 Wheeler transform. *Bioinformatics* **25**, 1754–60 (2009).
- 1060 41. Van der Auwera, G. A. *et al.* From FastQ data to high confidence variant  
1061 calls: the Genome Analysis Toolkit best practices pipeline. *Curr. Protoc.*  
1062 *Bioinformatics* **43**, 11.10.1-33 (2013).
- 1063 42. Powell, J. E., Visscher, P. M. & Goddard, M. E. Reconciling the analysis of

Westra et al.

- 1064 IBD and IBS in complex trait studies. *Nat. Rev. Genet.* **11**, 800–805 (2010).
- 1065 43. Zhernakova, D. V *et al.* Identification of context-dependent expression  
1066 quantitative trait loci in whole blood. *Nat. Genet.* (2016).  
1067 doi:10.1038/ng.3737
- 1068 44. Raj, T. *et al.* Polarization of the Effects of Autoimmune and  
1069 Neurodegenerative Risk Alleles in Leukocytes. *Science* (80-. ). **344**, 519–  
1070 523 (2014).
- 1071 45. Ernst, J. & Kellis, M. ChromHMM: automating chromatin-state discovery  
1072 and characterization. *Nat. Methods* **9**, 215–216 (2012).
- 1073 46. Roadmap Epigenomics Consortium, A. *et al.* Integrative analysis of 111  
1074 reference human epigenomes. *Nature* **518**, 317–30 (2015).
- 1075 47. Ward, L. D. & Kellis, M. HaploReg v4: systematic mining of putative causal  
1076 variants, cell types, regulators and target genes for human complex traits  
1077 and disease. *Nucleic Acids Res.* **44**, D877–D881 (2016).
- 1078 48. Buenrostro, J. D., Giresi, P. G., Zaba, L. C., Chang, H. Y. & Greenleaf, W.  
1079 J. Transposition of native chromatin for fast and sensitive epigenomic  
1080 profiling of open chromatin, DNA-binding proteins and nucleosome  
1081 position. *Nat. Methods* **10**, 1213–8 (2013).
- 1082 49. Zhang, Y. *et al.* Model-based analysis of ChIP-Seq (MACS). *Genome Biol.*  
1083 **9**, R137 (2008).

1084



Figure 1

A

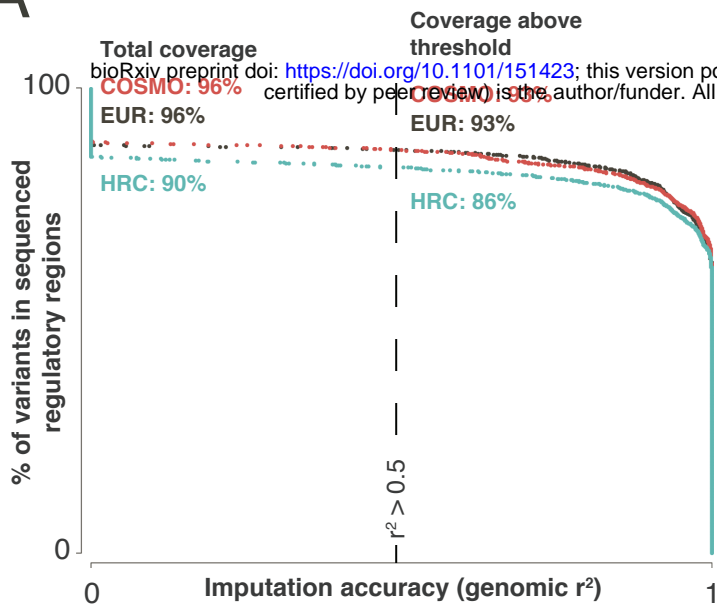

B

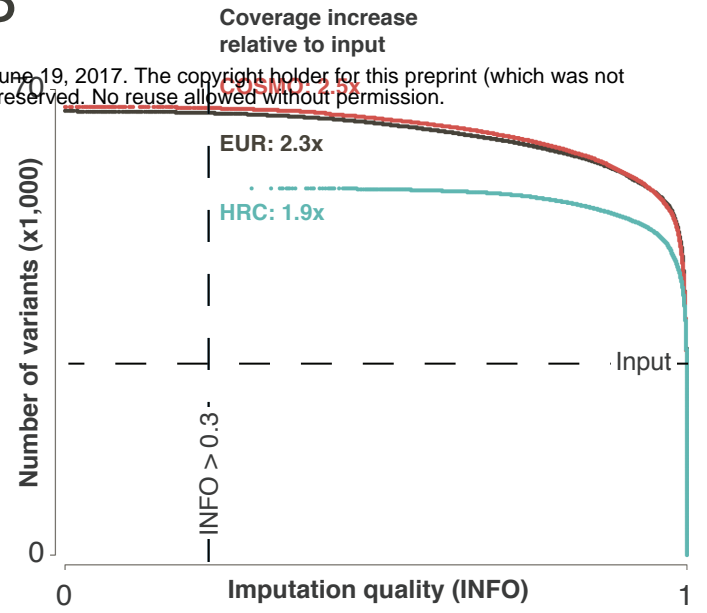

# Figure 2

## A

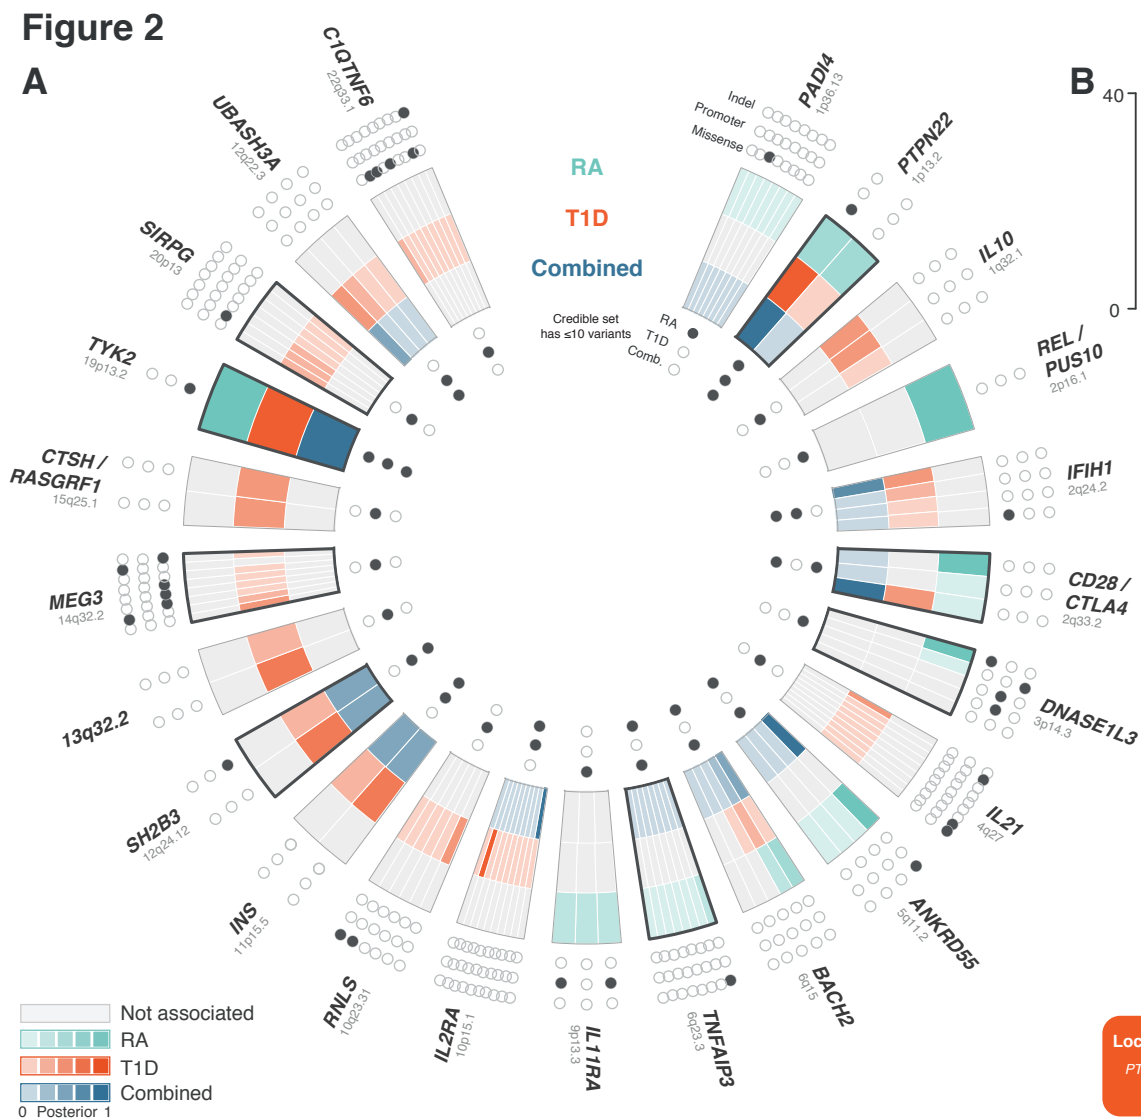

## B

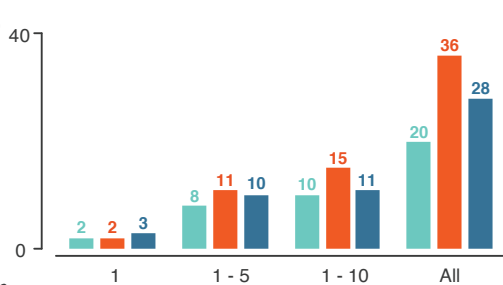

## C

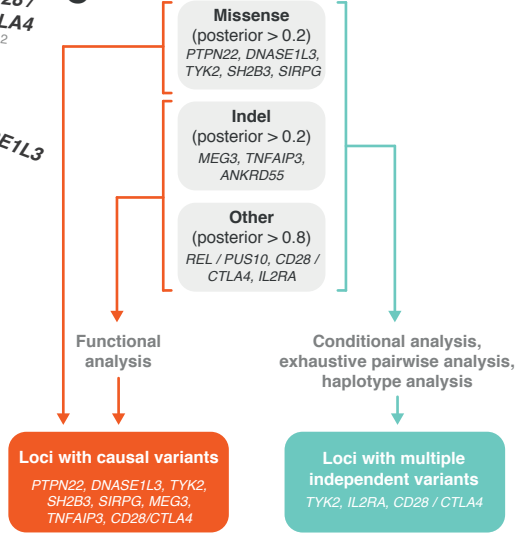

# Figure 3 - *CD28 / CTLA4*

## A RA, T1D Combined

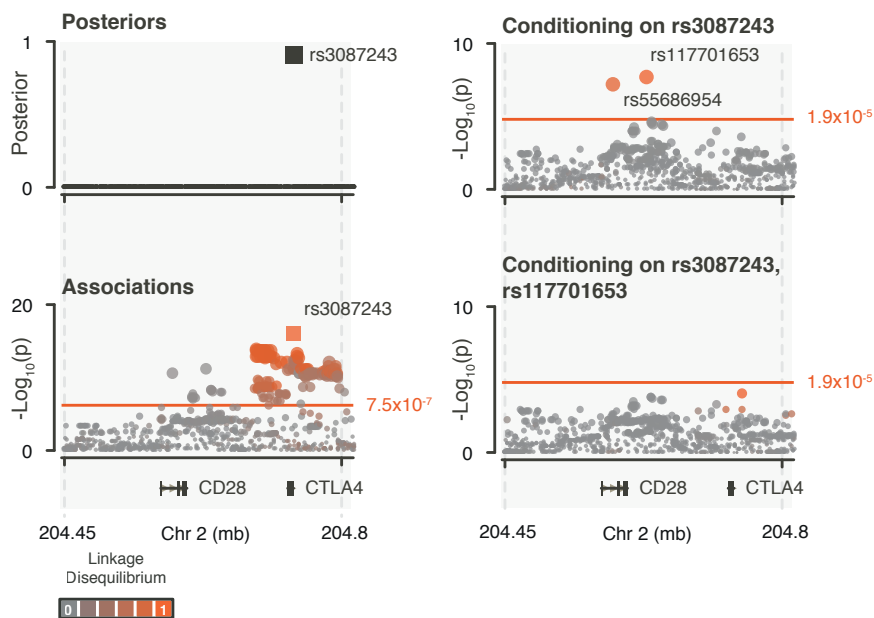

## B Rheumatoid Arthritis

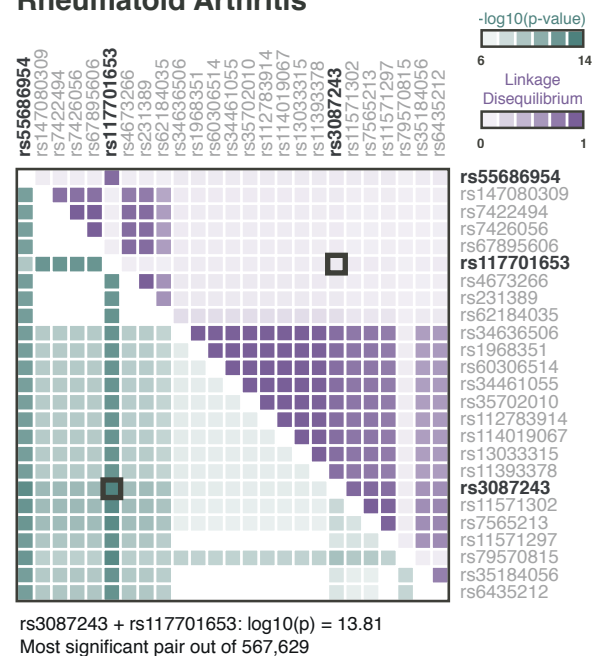

## C

| Dataset | Frequency | Odds-ratio  | Cases Controls |             |
|---------|-----------|-------------|----------------|-------------|
|         |           |             | 0.6            | 1           |
| A   G   | Combined  | 0.588 0.554 | (reference)    | (reference) |
|         | RA        | 0.584 0.552 | (reference)    | (reference) |
|         | T1D       | 0.594 0.554 | (reference)    | (reference) |
| C   A   | Combined  | 0.027 0.036 |                |             |
|         | RA        | 0.027 0.036 |                |             |
|         | T1D       | 0.389 0.412 |                |             |
| A   A   | Combined  | 0.385 0.41  |                |             |
|         | RA        | 0.029 0.035 |                |             |
|         | T1D       | 0.377 0.412 |                |             |

## D

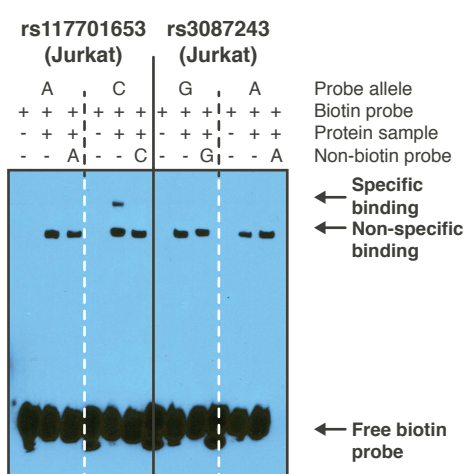

## E

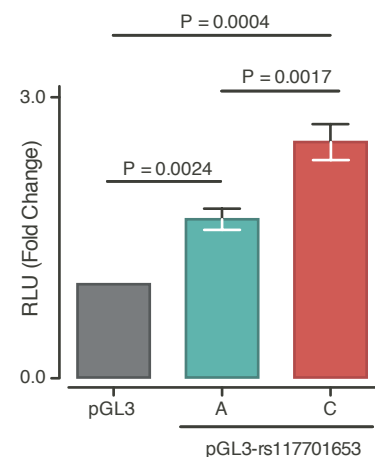

# Figure 4 - *TNFAIP3*

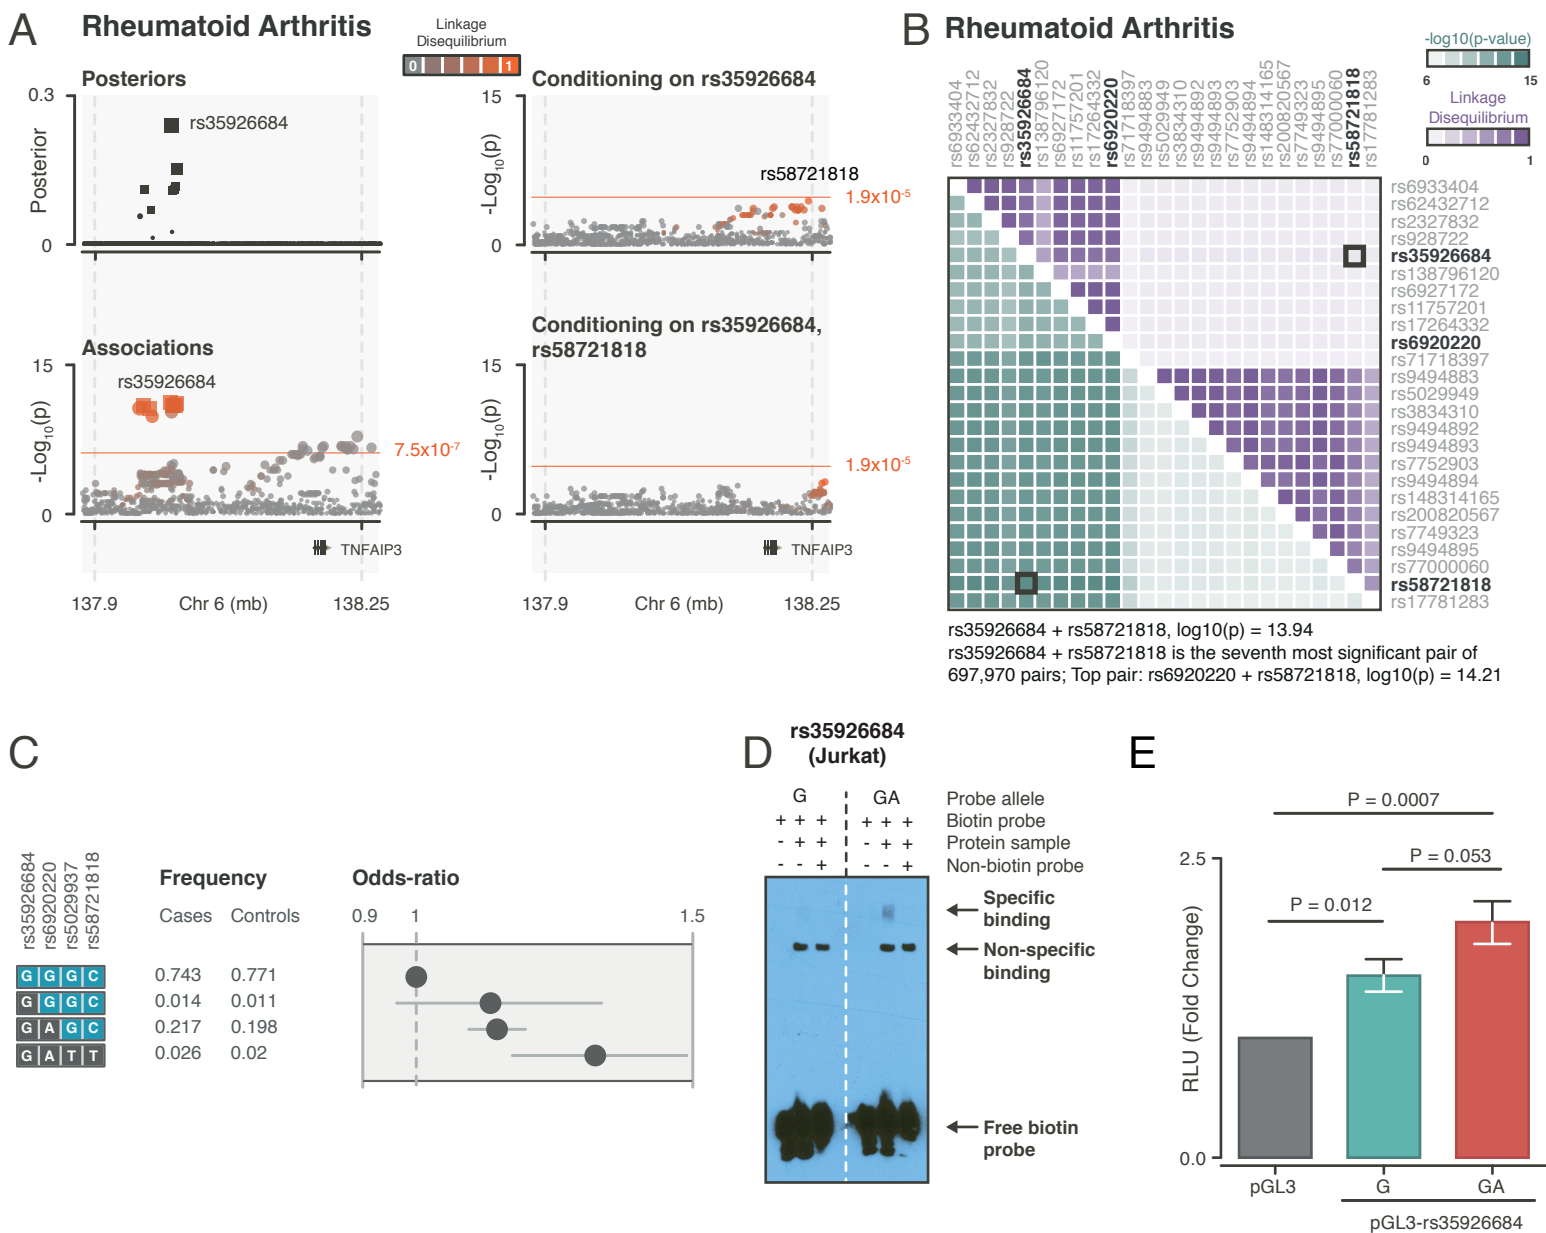

# Figure 5 - *MEG3*

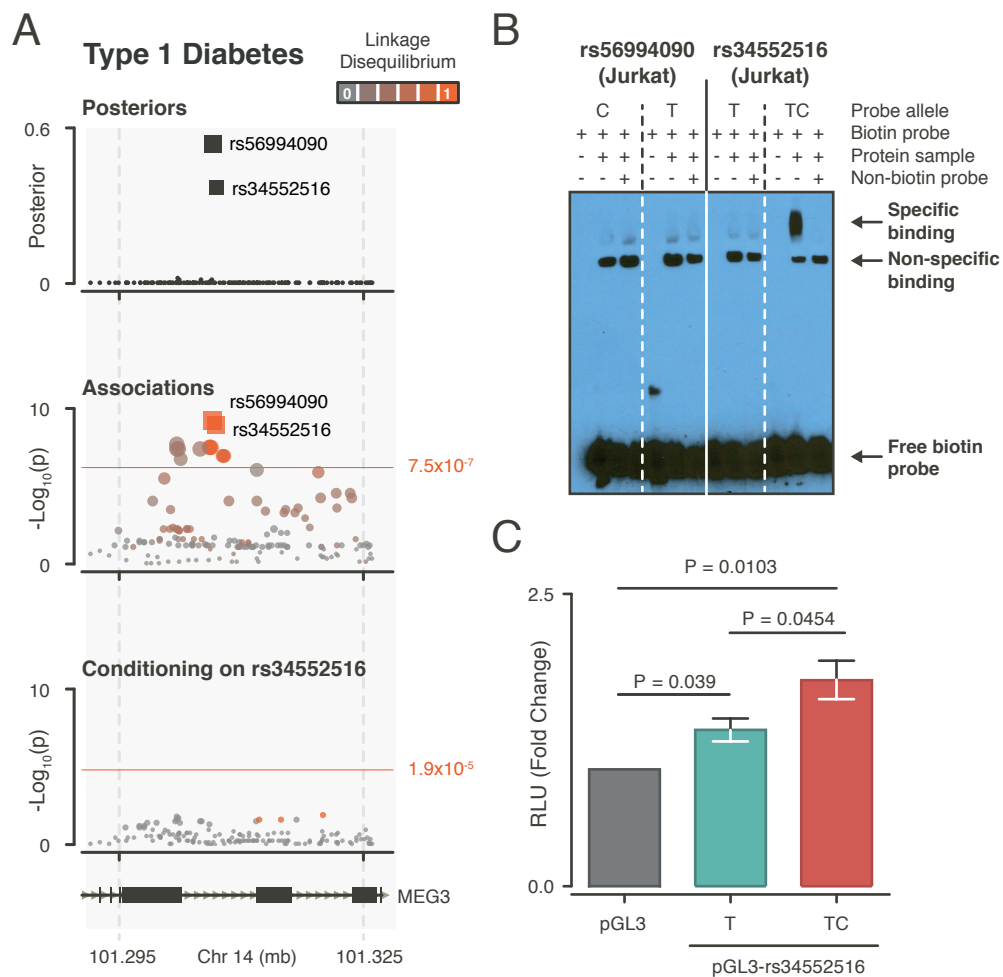

Source: http://biorxiv.org/content/10.1101/151423v1.full.pdf
